# Supplementary material for: Identification of Interconnected Markers for T-Cell Acute Lymphoblastic Leukemia
Source: Hindawi journal article supplement (doi:10.1155/2013/210253), 2013-01-01
Supplement: f1 [file 210253.f1.pdf]

## SUPPLEMENTARY MATERIALS

The genes in the subnetworks and their functions are given as tables S1 through S19 (for each individual subnetwork, there is one table).

**Table S1:** The genes in Subnetwork-1 and their functions according to GO

| Gene Symbol | Gene title                                                                                | GO:Function                                                                                                                      | GO:Process                                                                                                           |
|-------------|-------------------------------------------------------------------------------------------|----------------------------------------------------------------------------------------------------------------------------------|----------------------------------------------------------------------------------------------------------------------|
| MYO10       | myosin X                                                                                  | ATP binding, actin binding, motor activity, nucleotide binding                                                                   | signal transduction                                                                                                  |
| TNNI2       | troponin I type 2 (skeletal, fast)                                                        | Contributes to actin binding, protein binding, troponin T binding                                                                | positive regulation of transcription, skeletal muscle contraction                                                    |
| KCNN4       | potassium intermediate/small conductance calcium-activated channel, subfamily N, member 4 | calcium-activated potassium channel activity, calmodulin binding, ion channel activity, voltage-gated potassium channel activity | defense response, ion transport, positive regulation of protein secretion, potassium ion transport, saliva secretion |
| ADD2        | adducin 2 (beta)                                                                          | actin binding, calmodulin binding, metal ion binding                                                                             |                                                                                                                      |
| CALM1       | calmodulin 1 (phosphorylase kinase, delta)                                                |                                                                                                                                  |                                                                                                                      |

**Table S2:** The genes in Subnetwork-2 and their functions according to GO

| Gene Symbol | Gene title                                           | GO:Function                                                                                                                                                                                                                                          | GO:Process                                                                                                                                                                                                                                                                                                                                                                                |
|-------------|------------------------------------------------------|------------------------------------------------------------------------------------------------------------------------------------------------------------------------------------------------------------------------------------------------------|-------------------------------------------------------------------------------------------------------------------------------------------------------------------------------------------------------------------------------------------------------------------------------------------------------------------------------------------------------------------------------------------|
| CCR5        | chemokine (C-C motif) receptor 5                     | C-C chemokine receptor activity, C-C chemokine receptor activity, actin binding, coreceptor activity, phosphoinositide phospholipase C activity, protein binding, receptor activity, rhodopsin-like receptor activity                                | G-protein coupled receptor protein signaling pathway, cell-cell signaling, cellular defense response, chemotaxis, elevation of cytosolic calcium ion concentration, immune response, inflammatory response, initiation of viral infection, signal transduction                                                                                                                            |
| CCL5        | chemokine (C-C motif) ligand 5                       | chemoattractant activity, chemokine activity, signal transducer activity                                                                                                                                                                             | cell adhesion, cell motility, cell-cell signaling, cellular calcium ion homeostasis, cellular defense response, chemotaxis, exocytosis, immune response, Inflammatory response, negative regulation of viral genome replication, response to oxidative stress, response to virus, signal transduction                                                                                     |
| PTK2        | PTK2 protein tyrosine kinase 2                       | ATP binding, SH2 domain binding, non-membrane spanning protein tyrosine kinase activity, nucleotide binding, protein binding, protein tyrosine kinase activity, signal transducer activity, transferase activity                                     | integrin-mediated signaling pathway, protein amino acid phosphorylation, signal complex assembly                                                                                                                                                                                                                                                                                          |
| ORM1        | orosomucoid 1                                        | protein binding                                                                                                                                                                                                                                      | acute-phase response, inflammatory response                                                                                                                                                                                                                                                                                                                                               |
| CCL14       | chemokine (C-C motif) ligand 14                      | chemokine activity, protein binding, signal transducer activity                                                                                                                                                                                      | cellular calcium ion homeostasis, immune response, positive regulation of cell proliferation                                                                                                                                                                                                                                                                                              |
| ARL6IP5     | ADP-ribosylation-like factor 6 interacting protein 5 | protein binding                                                                                                                                                                                                                                      | L-glutamate transport                                                                                                                                                                                                                                                                                                                                                                     |
| ADRBK1      | adrenergic, beta, receptor kinase 1                  | ATP binding, G-protein coupled receptor kinase activity, beta-adrenergic receptor kinase activity, nucleotide binding, protein kinase activity, protein serine/threonine kinase activity, receptor activity, signal transducer activity, transferase | cardiac muscle contraction, desensitization of G-protein coupled receptor protein signaling pathway, heart development, negative regulation of striated muscle contraction, negative regulation of the force of heart contraction by chemical signal, protein amino acid phosphorylation, regulation of the force of heart contraction, signal transduction, tachykinin signaling pathway |

|  |  |          |  |
|--|--|----------|--|
|  |  | activity |  |
|--|--|----------|--|

**Table S3:** The genes in Subnetwork-3 and their functions according to GO

| Gene Symbol | Gene title                                                                                  | GO:Function                                                                                                           | GO:Process                                                                                                                               |
|-------------|---------------------------------------------------------------------------------------------|-----------------------------------------------------------------------------------------------------------------------|------------------------------------------------------------------------------------------------------------------------------------------|
| CD36        | CD36 molecule (thrombospondin receptor)                                                     | lipoprotein binding, low-density lipoprotein receptor activity, receptor activity                                     | blood coagulation, cell adhesion, lipid metabolic process, lipoprotein transport, transport                                              |
| ITGA2B      | integrin, alpha 2b (platelet glycoprotein IIb of IIb/IIIa complex, antigen CD41)            | calcium ion binding, identical protein binding, protein binding, receptor activity                                    | cell adhesion, integrin-mediated signaling pathway                                                                                       |
| COL5A3      | collagen, type V, alpha 3                                                                   | extracellular matrix structural constituent, heparin binding                                                          | cell adhesion ,cell-matrix adhesion, muscle development, organ morphogenesis, phosphate transport                                        |
| P4HB        | procollagen-proline, 2-oxoglutarate 4-dioxygenase (proline 4-hydroxylase), beta polypeptide | isomerase activity, procollagen-proline 4-dioxygenase activity, protein binding, protein disulfide isomerase activity | cell redox homeostasis, peptidyl-proline hydroxylation to 4-hydroxy-L-proline                                                            |
| COL1A2      | collagen, type I, alpha 2                                                                   | extracellular matrix structural constituent, protein binding                                                          | phosphate transport, sensory perception of sound, skeletal development, transmembrane receptor protein tyrosine kinase signaling pathway |

**Table S4:** The genes in Subnetwork-4 and their functions according to GO

| Gene Symbol | Gene title                                             | GO:Function                                                                                                                                                                                                                                               | GO:Process                                                                                                                                                                                                                                                                                                                                                                                                                                                                                                                                                                                                                                                                                                                                                                                 |
|-------------|--------------------------------------------------------|-----------------------------------------------------------------------------------------------------------------------------------------------------------------------------------------------------------------------------------------------------------|--------------------------------------------------------------------------------------------------------------------------------------------------------------------------------------------------------------------------------------------------------------------------------------------------------------------------------------------------------------------------------------------------------------------------------------------------------------------------------------------------------------------------------------------------------------------------------------------------------------------------------------------------------------------------------------------------------------------------------------------------------------------------------------------|
| STRA13      | stimulated by retinoic acid 13 homolog (mouse)         | DNA binding                                                                                                                                                                                                                                               |                                                                                                                                                                                                                                                                                                                                                                                                                                                                                                                                                                                                                                                                                                                                                                                            |
| SMAD4       | SMAD family member 4                                   | SMAD binding, protein homodimerization activity, sequence-specific DNA binding ,transcription activator activity, transcription factor activity                                                                                                           | BMP signaling pathway, SMAD protein complex assembly, anterior/posterior pattern formation, kidney development, negative regulation of cell growth, negative regulation of cell proliferation, negative regulation of transcription, DNA-dependent, positive regulation of transcription from RNA polymerase II promoter, regulation of binding, regulation of transforming growth factor beta receptor signaling pathway, regulation of transforming growth factor-beta2 production, response to hypoxia, transcription, ureteric bud branching                                                                                                                                                                                                                                           |
| UBE2I       | ubiquitin-conjugating enzyme E2I (UBC9 homolog, yeast) | HLH domain binding, ligase activity ,protein binding, small conjugating protein ligase activity                                                                                                                                                           | cell cycle, cell division, chromosome segregation, mitosis, regulation of protein metabolic process, ubiquitin cycle, ubiquitin-dependent protein catabolic process                                                                                                                                                                                                                                                                                                                                                                                                                                                                                                                                                                                                                        |
| TP53        | tumor protein p53                                      | ATP binding, DNA strand annealing activity, chromatin binding, copper ion binding, enzyme binding, metal ion binding, nuclease activity, protein N-terminus binding, protein heterodimerization activity, transcription factor activity, zinc ion binding | DNA damage response, apoptosis, signal transduction by p53 class mediator resulting in induction of apoptosis, ER overload response, RNA-protein covalent cross-linking, base-excision repair, caspase activation via cytochrome c, cell aging, cell cycle arrest, cell differentiation, cell proliferation, cellular response to glucose starvation, induction of apoptosis by intracellular signals, multicellular organismal development, negative regulation of cell cycle, negative regulation of cell growth, negative regulation of helicase activity, positive regulation of transcription from RNA polymerase II promoter, protein complex assembly, protein localization, regulation of mitochondrial membrane permeability, regulation of transcription, response to tumor cell |
| RANBP2      | RAN binding protein 2                                  | Ran GTPase binding, isomerase activity, metal ion binding, peptidyl-prolyl cis-trans isomerase                                                                                                                                                            | intracellular protein transport across a membrane,I ntracellular transport, mRNA transport, protein folding, protein import into nucleus, ubiquitin cycle                                                                                                                                                                                                                                                                                                                                                                                                                                                                                                                                                                                                                                  |

|        |                                                                                                    |                                                                                                                                                                                                                                                  |                                                                                                                             |
|--------|----------------------------------------------------------------------------------------------------|--------------------------------------------------------------------------------------------------------------------------------------------------------------------------------------------------------------------------------------------------|-----------------------------------------------------------------------------------------------------------------------------|
|        |                                                                                                    | activity, protein binding,<br>zinc ion binding                                                                                                                                                                                                   |                                                                                                                             |
| ATF2   | activating<br>transcription<br>factor 2                                                            | RNA polymerase II<br>transcription factor<br>activity, metal ion<br>binding, protein<br>dimerization activity,<br>sequence-specific DNA<br>binding, transcription<br>coactivator activity,<br>transcription factor<br>activity, zinc ion binding | regulation of transcription                                                                                                 |
| WT1    | Wilms tumor<br>1                                                                                   | metal ion binding,<br>transcription factor<br>activity, zinc ion binding                                                                                                                                                                         | negative regulation of cell cycle, negative regulation of<br>transcription from RNA polymerase II promoter                  |
| SOX4   | SRY (sex<br>determining<br>region Y)-<br>box 4                                                     | transcription factor activity                                                                                                                                                                                                                    | regulation of transcription                                                                                                 |
| TFAP2C | transcription<br>factor AP-2<br>gamma<br>(activating<br>enhancer<br>binding<br>protein 2<br>gamma) | protein dimerization<br>activity, transcription<br>factor activity                                                                                                                                                                               | cell differentiation, cell-cell signaling, regulation of<br>transcription from RNA polymerase II promoter,<br>transcription |

**Table S5:** The genes in Subnetwork-5 and their functions according to GO

| Gene<br>Symbol | Gene title                                 | GO:Function                                                                                | GO:Process                                                                                                                                                                                 |
|----------------|--------------------------------------------|--------------------------------------------------------------------------------------------|--------------------------------------------------------------------------------------------------------------------------------------------------------------------------------------------|
| GRK6           | G protein-<br>coupled receptor<br>kinase 6 | ATP binding, nucleotide<br>binding, signal transducer<br>activity, transferase<br>activity | amino acid phosphorylation, regulation of G-protein<br>coupled receptor protein signaling pathway, signal<br>transduction                                                                  |
| LTB4R          | leukotriene B4<br>receptor                 | nucleotide binding,<br>receptor activity                                                   | G-protein signaling, coupled to IP3 second messenger<br>(phospholipase C activating), cell motility, immune<br>response, inflammatory response, muscle contraction,<br>signal transduction |
| SNCA           | synuclein, alpha<br>(non A4                | identical protein binding                                                                  | anti-apoptosis, central nervous system development,<br>dopamine biosynthetic process, phospholipid metabolic                                                                               |

|        |                                 |                                  |                                                                                                                                                                                                                               |
|--------|---------------------------------|----------------------------------|-------------------------------------------------------------------------------------------------------------------------------------------------------------------------------------------------------------------------------|
|        | component of amyloid precursor) |                                  | process, positive regulation of neurotransmitter secretion, regulation of locomotion, regulation of long-term neuronal synaptic plasticity, response to drug, synaptic transmission, dopaminergic, synaptic vesicle transport |
| TBXA2R | thromboxane A2 receptor         | rhodopsin-like receptor activity | G-protein coupled receptor protein signaling pathway, signal transduction                                                                                                                                                     |

**Table S6:** The genes in Subnetwork-6 and their functions according to GO

| Gene Symbol | Gene title                                     | GO:Function                                                                                                                                            | GO:Process                                                                                                                                           |
|-------------|------------------------------------------------|--------------------------------------------------------------------------------------------------------------------------------------------------------|------------------------------------------------------------------------------------------------------------------------------------------------------|
| ATXN3       | ataxin 3                                       | hydrolase activity ,protein binding                                                                                                                    | cell death, nervous system development, nucleotide-excision repair, regulation of transcription, DNA-dependent, synaptic transmission, transcription |
| SALL2       | sal-like 2 (Drosophila)                        | metal ion binding, transcription factor activity, zinc ion binding                                                                                     | regulation of transcription                                                                                                                          |
| TSPAN3      | tetraspanin 3                                  |                                                                                                                                                        |                                                                                                                                                      |
| PRTFDC1     | phosphoribosyl transferase domain containing 1 | hypoxanthine phosphoribosyltransferase activity                                                                                                        | nucleoside metabolic process, purine ribonucleoside salvage                                                                                          |
| EWSR1       | Ewing sarcoma breakpoint region 1              | RNA binding, calmodulin binding, metal ion binding, nucleotide binding, sequence-specific DNA binding, transcription factor activity, zinc ion binding | regulation of transcription, DNA-dependent, transcription                                                                                            |

**Table S7:** The genes in Subnetwork-7 and their functions according to GO

| Gene Symbol | Gene title                                     | GO:Function                                                             | GO:Process                                                  |
|-------------|------------------------------------------------|-------------------------------------------------------------------------|-------------------------------------------------------------|
| PRTFDC1     | phosphoribosyl transferase domain containing 1 | hypoxanthine phosphoribosyltransferase activity                         | nucleoside metabolic process, purine ribonucleoside salvage |
| EWSR1       | Ewing sarcoma breakpoint region                | RNA binding, calmodulin binding, metal ion binding, nucleotide binding, | regulation of transcription, DNA-dependent,                 |

|         |                                                                                           |                                                                                                                                             |                                                                                                                                                                               |
|---------|-------------------------------------------------------------------------------------------|---------------------------------------------------------------------------------------------------------------------------------------------|-------------------------------------------------------------------------------------------------------------------------------------------------------------------------------|
|         | 1                                                                                         | sequence-specific DNA binding, transcription factor activity, zinc ion binding                                                              | transcription                                                                                                                                                                 |
| SSBP2   | single-stranded DNA binding protein 2                                                     | single-stranded DNA binding, transcription regulator activity                                                                               | regulation of transcription                                                                                                                                                   |
| CEACAM5 | carcinoembryonic antigen-related cell adhesion molecule 5                                 |                                                                                                                                             |                                                                                                                                                                               |
| YWHAG   | tyrosine 3-monooxygenase/tryptophan 5-monooxygenase activation protein, gamma polypeptide | insulin-like growth factor receptor binding, protein domain specific binding, protein kinase C binding, protein kinase C inhibitor activity | Negative regulation of protein kinase activity, protein targeting, regulation of neuron differentiation, regulation of signal transduction, regulation of synaptic plasticity |

**Table S8:** The genes in Subnetwork-8 and their functions according to GO

| Gene Symbol | Gene title                                         | GO:Function                                                                                                                                     | GO:Process                                                                                                                                                                                                                                                                                                                                                                                                                                                                                                                                       |
|-------------|----------------------------------------------------|-------------------------------------------------------------------------------------------------------------------------------------------------|--------------------------------------------------------------------------------------------------------------------------------------------------------------------------------------------------------------------------------------------------------------------------------------------------------------------------------------------------------------------------------------------------------------------------------------------------------------------------------------------------------------------------------------------------|
| DVL1        | dishevelled, dsh homolog 1 (Drosophila)            | protein binding, signal transducer activity                                                                                                     | Wnt receptor signaling pathway, anatomical structure morphogenesis, heart development, intracellular signaling cascade, multicellular organismal development                                                                                                                                                                                                                                                                                                                                                                                     |
| VANGL1      | vang-like 1 (van gogh, Drosophila)                 | protein binding                                                                                                                                 | multicellular organismal development                                                                                                                                                                                                                                                                                                                                                                                                                                                                                                             |
| SMAD4       | SMAD family member 4                               | SMAD binding, protein homodimerization activity, sequence-specific DNA binding, transcription activator activity, transcription factor activity | BMP signaling pathway, SMAD protein complex assembly, anterior/posterior pattern formation, kidney development, negative regulation of cell growth, negative regulation of cell proliferation, negative regulation of transcription, DNA-dependent, positive regulation of transcription from RNA polymerase II promoter, regulation of binding, regulation of transforming growth factor beta receptor signaling pathway, regulation of transforming growth factor-beta2 production, response to hypoxia, transcription, ureteric bud branching |
| USP13       | ubiquitin specific peptidase 13 (isopeptidase T-3) | cysteine-type endopeptidase activity, metal ion binding, ubiquitin thiolesterase activity, zinc ion binding                                     | ubiquitin cycle, ubiquitin-dependent protein catabolic process                                                                                                                                                                                                                                                                                                                                                                                                                                                                                   |
| VANGL2      | vang-like 2 (van gogh, Drosophila)                 | protein binding                                                                                                                                 | apical protein localization, establishment of planar polarity, heart looping, multicellular organismal development, neural tube closure, sensory cilium biogenesis                                                                                                                                                                                                                                                                                                                                                                               |

|       |               |                                                                      |                                                       |
|-------|---------------|----------------------------------------------------------------------|-------------------------------------------------------|
| CXXC4 | CXXC finger 4 | DNA binding, PDZ domain binding, metal ion binding, zinc ion binding | negative regulation of Wnt receptor signaling pathway |
|-------|---------------|----------------------------------------------------------------------|-------------------------------------------------------|

**Table S9:** The genes in Subnetwork-9 and their functions according to GO

| Gene Symbol | Gene title                                                                      | GO:Function                                                                                                                                                             | GO:Process                                                                                                                                                                                                                                                                                                                                                                                                                                                                                                      |
|-------------|---------------------------------------------------------------------------------|-------------------------------------------------------------------------------------------------------------------------------------------------------------------------|-----------------------------------------------------------------------------------------------------------------------------------------------------------------------------------------------------------------------------------------------------------------------------------------------------------------------------------------------------------------------------------------------------------------------------------------------------------------------------------------------------------------|
| GSN         | gelsolin (amyloidosis, Finnish type)                                            | actin binding, calcium ion binding, protein binding                                                                                                                     | actin filament polymerization, actin filament severing, barbed-end actin filament capping                                                                                                                                                                                                                                                                                                                                                                                                                       |
| TPM1        | tropomyosin 1 (alpha)                                                           | actin binding, structural constituent of cytoskeleton, structural constituent of muscle                                                                                 | cell motility, regulation of heart contraction, regulation of muscle contraction                                                                                                                                                                                                                                                                                                                                                                                                                                |
| LASP1       | LIM and SH3 protein1                                                            | SH3/SH2 adaptor activity, actin binding, ion transmembrane transporter activity, metal ion binding, zinc ion binding                                                    | cortical cytoskeleton organization and biogenesis, ion transport                                                                                                                                                                                                                                                                                                                                                                                                                                                |
| TGM2        | transglutaminase 2 (C polypeptide, protein-glutamine-gamma-glutamyltransferase) | GTP binding, acyltransferase activity, calcium ion binding, protein domain specific binding, protein-glutamine gamma-glutamyltransferase activity, transferase activity | induction of apoptosis, blood vessel remodeling, elevation of cytosolic calcium ion concentration during G-protein signaling, coupled to IP3 second messenger (phospholipase C activating), isopeptide cross-linking via N6-(L-isoglutamyl)-L-lysine, peptide cross-linking, positive regulation of I-kappaB kinase/NF-kappaB cascade, positive regulation of cell adhesion, positive regulation of inflammatory response, positive regulation of smooth muscle cell proliferation, protein homooligomerization |
| NCF1        | neutrophil cytosolic factor 1, (chronic granulomatous disease,                  | GTP binding, GTPase activity, electron carrier activity, phosphoinositide                                                                                               | cell communication, cellular defense response                                                                                                                                                                                                                                                                                                                                                                                                                                                                   |



|       |                                                      |                                                                                                                        |                                            |
|-------|------------------------------------------------------|------------------------------------------------------------------------------------------------------------------------|--------------------------------------------|
|       | autosomal)                                           | binding, protein binding                                                                                               |                                            |
| ACTB  | actin, beta                                          | ATP binding, nucleotide binding, protein binding, structural constituent of cytoskeleton, structural molecule activity | cell motility, sensory perception of sound |
| P2RX7 | purinergic receptor P2X, ligand-gated ion channel, 7 | ATP binding, ATP-gated cation channel activity, ion channel activity                                                   | ion transport, signal transduction         |

**Table S10:** The genes in Subnetwork-10 and their functions according to GO

| Gene Symbol | Gene title      | GO:Function                                                                    | GO:Process                                         |
|-------------|-----------------|--------------------------------------------------------------------------------|----------------------------------------------------|
| TUBB1       | tubulin, beta 1 | GTP binding, GTPase activity, nucleotide binding, structural molecule activity | microtubule-based movement, protein polymerization |

**Table S11:** The genes in Subnetwork-11 and their functions according to GO

| Gene Symbol | Gene title                                                           | GO:Function                                                                                                        | GO:Process                                                                                                                                                                                                                           |
|-------------|----------------------------------------------------------------------|--------------------------------------------------------------------------------------------------------------------|--------------------------------------------------------------------------------------------------------------------------------------------------------------------------------------------------------------------------------------|
| PLSCR4      | phospholipid scramblase 4                                            | calcium ion binding, phospholipid scramblase activity                                                              | blood coagulation,phospholipid scrambling                                                                                                                                                                                            |
| SGTB        | small glutamine-rich tetratricopeptide repeat (TPR)-containing, beta | binding                                                                                                            |                                                                                                                                                                                                                                      |
| PLSCR1      | phospholipid scramblase 1                                            | calcium ion binding, phospholipid scramblase activity, protein binding                                             | phospholipid scrambling,platelet activation,response to virus                                                                                                                                                                        |
| GFI1B       | growth factor independent 1B transcription repressor                 | DNA binding, metal ion binding, specific RNA polymerase II transcription factor activity, zinc ion binding         | G1-specific transcription in mitotic cell cycle, cell proliferation, chromatin modification, multicellular organismal development, negative regulation of transcription from RNA polymerase II promoter, regulation of transcription |
| EFEMP2      | EGF-containing fibulin-like extracellular matrix protein 2           | calcium ion binding, extracellular matrix structural constituent, protein binding, transmembrane receptor activity | blood coagulation                                                                                                                                                                                                                    |

**Table S12:** The genes in Subnetwork-12 and their functions according to GO

| Gene Symbol | Gene title                                   | GO:Function                                                  | GO:Process                                                                                                                                                                                                                   |
|-------------|----------------------------------------------|--------------------------------------------------------------|------------------------------------------------------------------------------------------------------------------------------------------------------------------------------------------------------------------------------|
| ARL4C       | ADP-ribosylation factor-like 4C              | GTP binding, GTPase activity, nucleotide binding             | small GTPase mediated signal transduction                                                                                                                                                                                    |
| UBQLN4      | ubiquilin 4                                  | identical protein binding                                    | biological_process,protein modification process                                                                                                                                                                              |
| STMN1       | stathmin 1/oncprotein 18                     | protein binding, signal transducer activity, tubulin binding | cell differentiation, intracellular signaling cascade, microtubule depolymerization, mitotic spindle organization and biogenesis, multicellular organismal development, nervous system development                           |
| IGFBP6      | insulin-like growth factor binding protein 6 | insulin-like growth factor binding                           | negative regulation of cell proliferation, regulation of cell growth, signal transduction                                                                                                                                    |
| COPB1       | coatomer protein complex, subunit beta 1     | protein binding, structural molecule activity                | COPI coating of Golgi vesicle, intra-Golgi vesicle-mediated transport, intracellular protein transport, membrane organization and biogenesis, retrograde vesicle-mediated transport, Golgi to ER, vesicle-mediated transport |
| CD99        | CD99 molecule                                | protein binding                                              | cell adhesion                                                                                                                                                                                                                |

**Table S13:** The genes in Subnetwork-13 and their functions according to GO

| Gene Symbol | Gene title                                   | GO:Function                                                                              | GO:Process                                                                                                                                                                                                                                                                                                    |
|-------------|----------------------------------------------|------------------------------------------------------------------------------------------|---------------------------------------------------------------------------------------------------------------------------------------------------------------------------------------------------------------------------------------------------------------------------------------------------------------|
| NCR1        | natural cytotoxicity triggering receptor 1   | protein binding,receptor activity                                                        | cellular defense response, natural killer cell activation ,regulation of natural killer cell mediated cytotoxicity, signal transduction                                                                                                                                                                       |
| C9          | complement component 9                       |                                                                                          | caspase activation, complement activation-alternative pathway ,complement activation-classical pathway, cytolysis, hemolysis by symbiont of host red blood cells, induction of apoptosis                                                                                                                      |
| CD59        | CD59 molecule, complement regulatory protein | protein binding                                                                          | blood coagulation, cell surface receptor linked signal transduction                                                                                                                                                                                                                                           |
| CLU         | clusterin                                    | protein binding                                                                          | anti-apoptosis, apoptosis, cell death, complement activation, classical pathway, endocrine pancreas development ,innate immune response, lipid metabolic process, neurite morphogenesis, positive regulation of cell differentiation, positive regulation of cell proliferation, response to oxidative stress |
| LEPR        | leptin receptor                              | hematopoietin/interferon-class (D200-domain) cytokine receptor activity, protein binding | cell surface receptor linked signal transduction, energy reserve metabolic process, multicellular organismal development                                                                                                                                                                                      |

|     |                                                                             |                                                                                                                                                       |                                                                                                                        |
|-----|-----------------------------------------------------------------------------|-------------------------------------------------------------------------------------------------------------------------------------------------------|------------------------------------------------------------------------------------------------------------------------|
| APP | amyloid beta (A4) precursor protein (peptidase nexin-II, Alzheimer disease) | acetylcholine receptor binding, copper ion binding, heparin binding, iron ion binding, serine-type endopeptidase inhibitor activity, zinc ion binding | Notch signaling pathway, apoptosis, cell adhesion, cellular copper ion homeostasis, endocytosis, neuromuscular process |
|-----|-----------------------------------------------------------------------------|-------------------------------------------------------------------------------------------------------------------------------------------------------|------------------------------------------------------------------------------------------------------------------------|

**Table S14:** The genes in Subnetwork-14 and their functions according to GO

| Gene Symbol | Gene title                                                                            | GO:Function                                                                                                                                       | GO:Process                                                                                                                                                                                       |
|-------------|---------------------------------------------------------------------------------------|---------------------------------------------------------------------------------------------------------------------------------------------------|--------------------------------------------------------------------------------------------------------------------------------------------------------------------------------------------------|
| MEP1A       | meprin A, alpha (PABA peptide hydrolase)                                              | astacin activity, metal ion binding, metallopeptidase activity, zinc ion binding                                                                  | digestion, proteolysis                                                                                                                                                                           |
| SERPINI1    | serpin peptidase inhibitor, clade I (neuroserpin), member 1                           | serine-type endopeptidase inhibitor activity                                                                                                      | central nervous system development, peripheral nervous system development                                                                                                                        |
| THBS1       | thrombospondin 1                                                                      | calcium ion binding, endopeptidase inhibitor activity, heparin binding, protein binding, signal transducer activity, structural molecule activity | cell adhesion, multicellular organismal development                                                                                                                                              |
| MMP9        | matrix metallopeptidase 9 (gelatinase B, 92kDa gelatinase, 92kDa type IV collagenase) | calcium ion binding, collagen binding, collagenase activity, gelatinase B activity, zinc ion binding                                              | collagen catabolic process, extracellular matrix organization and biogenesis, macrophage differentiation, metabolic process, positive regulation of apoptosis, proteolysis, skeletal development |

|        |                                                       |                                                                                   |                                                                                                                                                                                                                                                                |
|--------|-------------------------------------------------------|-----------------------------------------------------------------------------------|----------------------------------------------------------------------------------------------------------------------------------------------------------------------------------------------------------------------------------------------------------------|
| CHGA   | chromogranin A (parathyroid secretory protein 1)      | calcium ion binding, protein binding                                              | regulation of blood pressure                                                                                                                                                                                                                                   |
| SPARC  | secreted protein, acidic, cysteine-rich (osteonectin) | calcium ion binding, collagen binding, copper ion binding                         | ossification, transmembrane receptor protein tyrosine kinase signaling pathway                                                                                                                                                                                 |
| CLEC3B | C-type lectin domain family 3, member B               | sugar binding                                                                     | skeletal development                                                                                                                                                                                                                                           |
| PLG    | plasminogen                                           | apolipoprotein binding, calcium ion binding, peptidase activity, plasmin activity | blood coagulation, induction of apoptosis, negative regulation of angiogenesis, negative regulation of blood vessel endothelial cell migration, negative regulation of cell proliferation, negative regulation of fibrinolysis, proteolysis, tissue remodeling |

**Table S15:** The genes in Subnetwork-15 and their functions according to GO

| Gene Symbol | Gene title            | GO:Function                                                                                           | GO:Process                                                                                                                                                                                                              |
|-------------|-----------------------|-------------------------------------------------------------------------------------------------------|-------------------------------------------------------------------------------------------------------------------------------------------------------------------------------------------------------------------------|
| CAT         | catalase              | NADP binding, catalase activity, heme binding, iron ion binding, protein homodimerization activity    | UV protection, hydrogen peroxide catabolic process, negative regulation of apoptosis, oxidation reduction, response to reactive oxygen species                                                                          |
| TLR10       | toll-like receptor 10 | protein binding,transmembrane receptor activity                                                       | I-kappaB kinase/NF-kappaB cascade,inflammatory response,innate immune response,signal transduction                                                                                                                      |
| TLR1        | toll-like receptor 1  | protein binding, transmembrane receptor activity                                                      | inflammatory response, innate immune response, macrophage activation, positive regulation of interleukin-6 biosynthetic process, positive regulation of tumor necrosis factor biosynthetic process, signal transduction |
| TLR2        | toll-like receptor 2  | Gram-positive bacterial binding, lipopolysaccharide receptor activity, peptidoglycan binding, protein | induction of apoptosis, I-kappaB kinase/NF-kappaB cascade, MyD88-dependent toll-like receptor signaling                                                                                                                 |

|      |                                                       |                                                    |                                                                                                                                                                                                                                                                     |
|------|-------------------------------------------------------|----------------------------------------------------|---------------------------------------------------------------------------------------------------------------------------------------------------------------------------------------------------------------------------------------------------------------------|
|      |                                                       | binding, transmembrane receptor activity           | pathway, cell surface pattern recognition receptor signaling pathway, chloramphenicol transport, inflammatory response, innate immune response, positive regulation of tumor necrosis factor production, response to molecule of fungal origin, signal transduction |
| FUT7 | fucosyltransferase 7 (alpha (1,3) fucosyltransferase) | transferase activity, transferring glycosyl groups | L-fucose catabolic process, protein amino acid glycosylation                                                                                                                                                                                                        |

**Table S16:** The genes in Subnetwork-16 and their functions according to GO

| Gene Symbol | Gene title                                     | GO:Function                                                                                                                                                                                                       | GO:Process                                                                                                                                                                                                                                                                                                                                                       |
|-------------|------------------------------------------------|-------------------------------------------------------------------------------------------------------------------------------------------------------------------------------------------------------------------|------------------------------------------------------------------------------------------------------------------------------------------------------------------------------------------------------------------------------------------------------------------------------------------------------------------------------------------------------------------|
| ABL1        | c-abl oncogene 1, receptor tyrosine kinase     | ATP binding,bDNA binding,bkinase activity,bmagnesium ion bindingb,manganese ion binding, membrane spanning protein tyrosine kinase activity, nucleotide binding, protein C-terminus binding, transferase activity | DNA damage response, signal transduction resulting in induction of apoptosis, S-phase-specific transcription in mitotic cell cycle, actin cytoskeleton organization and biogenesis, cell adhesion, mismatch repair, peptidyl-tyrosine phosphorylation, positive regulation of oxidoreductase activity, protein modification process, regulation of transcription |
| XRCC6       | X-ray repair complementing defective repair in | ATP-dependent DNA helicase activity, DNA binding, double-stranded DNA binding, protein                                                                                                                            | DNA ligation, DNA repair, double-strand break repair via nonhomologous end joining, initiation of viral infection, positive regulation of transcription,                                                                                                                                                                                                         |

|         |                                                       |                                                                                                                                                            |                                                                                                                                                                                                              |
|---------|-------------------------------------------------------|------------------------------------------------------------------------------------------------------------------------------------------------------------|--------------------------------------------------------------------------------------------------------------------------------------------------------------------------------------------------------------|
|         | Chinese hamster cells 6 (Ku autoantigen, 70kDa)       | binding                                                                                                                                                    | DNA-dependent, provirus integration                                                                                                                                                                          |
| GAL3ST4 | galactose-3-O-sulfotransferase 4                      | 3'-phosphoadenosine 5'-phosphosulfate binding ,proteoglycan sulfotransferase activity, transferase activity                                                | biosynthetic process, cell-cell signaling, glycoprotein metabolic process, oligosaccharide metabolic process, proteoglycan biosynthetic process, sulfur metabolic process                                    |
| OVGP1   | oviductal glycoprotein 1, 120kDa (mucin 9, oviductin) | catalytic activity, cation binding, chitinase activity                                                                                                     | carbohydrate metabolic process, chitin catabolic process, female pregnancy, single fertilization                                                                                                             |
| RASA4   | RAS p21 protein activator 4                           | GTPase activator activity, metal ion binding, zinc ion binding                                                                                             | intracellular signaling cascade, regulation of small GTPase mediated signal transduction                                                                                                                     |
| HN1L    | hematological and neurological expressed 1-like       | 0                                                                                                                                                          | 0                                                                                                                                                                                                            |
| DNTT    | deoxynucleotidyltransferase, terminal                 | DNA binding, DNA-directed DNA polymerase activity, catalytic activity, magnesium ion binding, transferase activity                                         | DNA modification, DNA replication                                                                                                                                                                            |
| ABCD4   | ATP-binding cassette, sub-family D (ALD), member 4    | ATP binding, ATPase activity, coupled to transmembrane movement of substances, nucleotide binding, transporter activity                                    | transport                                                                                                                                                                                                    |
| MAPK8   | mitogen-activated protein kinase 8                    | ATP binding, JUN kinase activity, MAP kinase activity, nucleotide binding, protein binding, protein serine/threonine kinase activity, transferase activity | activation of pro-apoptotic gene products, JUN phosphorylation, cell motility, negative regulation of apoptosis, protein amino acid phosphorylation, response to UV, response to stress, signal transduction |

**Table S17:** The genes in Subnetwork-17 and their functions according to GO

| Gene Symbol | Gene title                                  | GO:Function                                                                                         | GO:Process                                                                                                |
|-------------|---------------------------------------------|-----------------------------------------------------------------------------------------------------|-----------------------------------------------------------------------------------------------------------|
| DNAJC3      | DnaJ (Hsp40) homolog, subfamily C, member 3 | heat shock protein binding, protein kinase inhibitor activity                                       | response to unfolded protein, response to virus                                                           |
| IRAK2       | interleukin-1 receptor-associated kinase 2  | ATP binding, NF-kappaB-inducing kinase activity, identical protein binding ,protein kinase activity | I-kappaB kinase/NF-kappaB cascade, inflammatory response, amino acid phosphorylation, signal transduction |
| BTk         | Bruton agammaglobulinemi                    | ATP binding, kinase activity, metal ion binding, non-membrane spanning                              | calcium-mediated signaling, induction of apoptosis by extracellular signals,                              |



|        |                                                                     |                                                                                                                                |                                                                                                                                                                                                                                                                                                                                                                      |
|--------|---------------------------------------------------------------------|--------------------------------------------------------------------------------------------------------------------------------|----------------------------------------------------------------------------------------------------------------------------------------------------------------------------------------------------------------------------------------------------------------------------------------------------------------------------------------------------------------------|
|        | a tyrosine kinase                                                   | protein tyrosine kinase activity, nucleotide binding, protein tyrosine kinase activity, transferase activity, zinc ion binding | intracellular signaling cascade, mesoderm development, amino acid phosphorylation                                                                                                                                                                                                                                                                                    |
| TIRAP  | toll-interleukin 1 receptor (TIR) domain containing adaptor protein | protein binding, transmembrane receptor activity                                                                               | I-kappaB kinase/NF-kappaB cascade, inflammatory response, Innate immune response, signal transduction                                                                                                                                                                                                                                                                |
| IL1RL1 | interleukin 1 receptor-like 1                                       | interleukin-1 receptor activity, transmembrane receptor activity                                                               | innate immune response, signal transduction                                                                                                                                                                                                                                                                                                                          |
| TLR5   | toll-like receptor 5                                                | transmembrane receptor activity                                                                                                | inflammatory response, innate immune response, signal transduction                                                                                                                                                                                                                                                                                                   |
| TLR4   | toll-like receptor 4                                                | lipopolysaccharide binding,transmembrane receptor activity                                                                     | I-kappaB kinase/NF-kappaB cascade, T-helper 1 type immune response, detection of fungus, inflammatory response, innate immune response ,macrophage activation, negative regulation of osteoclast differentiation, positive regulation of interleukin-12 biosynthetic process, positive regulation of tumor necrosis factor biosynthetic process, signal transduction |

**Table S18:** The genes in Subnetwork-18 and their functions according to GO

| Gene Symbol | Gene title                      | GO:Function                                                                                             | GO:Process                                                                                                                                 |
|-------------|---------------------------------|---------------------------------------------------------------------------------------------------------|--------------------------------------------------------------------------------------------------------------------------------------------|
| USP20       | ubiquitin specific peptidase 20 | cysteine-type peptidase activity, metal ion binding, ubiquitin thiolesterase activity, zinc ion binding | protein deubiquitination, ubiquitin-dependent protein catabolic process                                                                    |
| PRKCI       | protein kinase C, iota          | ATP binding, atypical protein kinase C activity, diacylglycerol binding, metal                          | Golgi vesicle budding ,actin filament organization, cell-cell junction assembly and maintenance, cytoskeleton organization and biogenesis, |

|       |                                                     |                                                                                               |                                                                                                                                                                                                                                                                                                                        |
|-------|-----------------------------------------------------|-----------------------------------------------------------------------------------------------|------------------------------------------------------------------------------------------------------------------------------------------------------------------------------------------------------------------------------------------------------------------------------------------------------------------------|
|       |                                                     | ion binding, nucleotide binding, phospholipid binding, transferase activity, zinc ion binding | establishment and/or maintenance of epithelial cell polarity ,establishment of apical/basal cell polarity ,eye photoreceptor cell development, intracellular signaling cascade, membrane organization and biogenesis, amino acid phosphorylation, protein targeting to membrane, secretion, vesicle-mediated transport |
| PARD3 | par-3 partitioning defective 3 homolog (C. elegans) | protein binding                                                                               | activation of protein kinase C activity, asymmetric cell division, axonogenesis, cell cycle, establishment and/or maintenance of cell polarity, protein complex assembly                                                                                                                                               |
| PNMA1 | paraneoplastic antigen MA1                          | protein binding                                                                               | central nervous system development, spermatogenesis                                                                                                                                                                                                                                                                    |

**Table S19:** The genes in Subnetwork-18 and their functions according to GO

| Gene Symbol | Gene title                   | GO:Function                         | GO:Process                                                                                                                                                                                                                                     |
|-------------|------------------------------|-------------------------------------|------------------------------------------------------------------------------------------------------------------------------------------------------------------------------------------------------------------------------------------------|
| HHIP        | hedgehog interacting protein | catalytic activity, protein binding | dorsal/ventral pattern formation, lung development, negative regulation of smoothened signaling pathway, neuroblast proliferation, organ morphogenesis, regulation of fibroblast growth factor receptor signaling pathway, signal transduction |

The following tables (**Error! Reference source not found.**, **Error! Reference source not found.**) represent the functions and titles of 100 and 200 most differentially expressed genes.

**Table S20:** The titles and functions of 100 most differentially expressed genes.

| Gene symbol | Gene title | GO:Function | GO:Process |
|-------------|------------|-------------|------------|
|-------------|------------|-------------|------------|

|          |                                                |                                                                                                                                                                                                               |                                                                                                                                                                            |
|----------|------------------------------------------------|---------------------------------------------------------------------------------------------------------------------------------------------------------------------------------------------------------------|----------------------------------------------------------------------------------------------------------------------------------------------------------------------------|
| ACPP     | acid phosphatase, prostate                     | acid phosphatase activity, hydrolase activity                                                                                                                                                                 |                                                                                                                                                                            |
| AGPAT9   | 1-acylglycerol-3-phosphate O-acyltransferase 9 | 1-acylglycerol-3-phosphate O-acyltransferase activity, acyltransferase activity, transferase activity                                                                                                         | metabolic process, phospholipid biosynthetic process                                                                                                                       |
| ALDH1A1  | aldehyde dehydrogenase 1 family, member A1     | Ras GTPase activator activity, aldehyde dehydrogenase (NAD) activity, aldehyde dehydrogenase (NAD) activity, androgen binding, oxidoreductase activity, retinal dehydrogenase activity                        | aldehyde metabolic process, metabolic process, oxidation reduction                                                                                                         |
| ALDH3A2  | aldehyde dehydrogenase 3 family, member A2     | 3-chloroallyl aldehyde dehydrogenase activity, aldehyde dehydrogenase (NAD) activity, aldehyde dehydrogenase (NAD(P)+) activity, oxidoreductase activity                                                      | aldehyde metabolic process, central nervous system development, epidermis development, lipid metabolic process, oxidation reduction, peripheral nervous system development |
| ALDH3B1  | aldehyde dehydrogenase 3 family, member B1     | 3-chloroallyl aldehyde dehydrogenase activity, aldehyde dehydrogenase (NAD(P)+) activity, oxidoreductase activity                                                                                             | alcohol metabolic process, aldehyde metabolic process, lipid metabolic process, metabolic process, oxidation reduction                                                     |
| ANK1     | ankyrin 1, erythrocytic                        | cytoskeletal adaptor activity, enzyme binding, spectrin binding, structural constituent of cytoskeleton                                                                                                       | cytoskeleton organization and biogenesis, exocytosis, maintenance of epithelial cell polarity, signal transduction                                                         |
| ANKRD18A | ankyrin repeat domain 18A                      |                                                                                                                                                                                                               |                                                                                                                                                                            |
| ANKRD22  | ankyrin repeat domain 22                       |                                                                                                                                                                                                               |                                                                                                                                                                            |
| APOC1    | apolipoprotein C-I                             | lipid transporter activity                                                                                                                                                                                    | cholesterol efflux, lipid metabolic process, lipid transport, lipoprotein metabolic process, phospholipid efflux                                                           |
| ARHGAP24 | Rho GTPase activating protein 24               | GTPase activator activity, protein binding                                                                                                                                                                    | angiogenesis, cell differentiation, multicellular organismal development, signal transduction                                                                              |
| ATP8B4   | ATPase, class I, type 8B, member 4             | ATP binding, ATPase activity, coupled to transmembrane movement of ions, phosphorylative mechanism, hydrolase activity, magnesium ion binding, nucleotide binding, phospholipid-translocating ATPase activity | phospholipid transport, transport                                                                                                                                          |
| B4GALT5  | UDP-Gal:betaGlcNAc                             | galactosyltransferase activity,                                                                                                                                                                               | carbohydrate metabolic process                                                                                                                                             |

|          |                                                                                  |                                                                                                                                                                  |                                                                                                                                                                                                                                                                                                                                                                                                                                              |
|----------|----------------------------------------------------------------------------------|------------------------------------------------------------------------------------------------------------------------------------------------------------------|----------------------------------------------------------------------------------------------------------------------------------------------------------------------------------------------------------------------------------------------------------------------------------------------------------------------------------------------------------------------------------------------------------------------------------------------|
|          | beta 1, 4-galactosyltransferase, polypeptide 5                                   | manganese ion binding, metal ion binding, transferase activity, transferring glycosyl groups                                                                     |                                                                                                                                                                                                                                                                                                                                                                                                                                              |
| BCL2L15  | BCL2-like 15                                                                     |                                                                                                                                                                  | apoptosis                                                                                                                                                                                                                                                                                                                                                                                                                                    |
| C1orf38  | chromosome 1 open reading frame 38                                               |                                                                                                                                                                  | cell adhesion                                                                                                                                                                                                                                                                                                                                                                                                                                |
| C22orf25 | chromosome 22 open reading frame 25                                              |                                                                                                                                                                  |                                                                                                                                                                                                                                                                                                                                                                                                                                              |
| C9orf122 | chromosome 9 open reading frame 122                                              |                                                                                                                                                                  |                                                                                                                                                                                                                                                                                                                                                                                                                                              |
| CCNDBP1  | cyclin D-type binding-protein 1                                                  | protein binding                                                                                                                                                  | cell cycle                                                                                                                                                                                                                                                                                                                                                                                                                                   |
| CCPG1    | cell cycle progression 1                                                         |                                                                                                                                                                  | cell cycle                                                                                                                                                                                                                                                                                                                                                                                                                                   |
| CDC14B   | CDC14 cell division cycle 14 homolog B (S. cerevisiae)                           | hydrolase activity, protein serine/threonine phosphatase activity, protein tyrosine phosphatase activity, protein tyrosine/serine/threonine phosphatase activity | cell division, protein amino acid dephosphorylation                                                                                                                                                                                                                                                                                                                                                                                          |
| CEACAM1  | carcinoembryonic antigen-related cell adhesion molecule 1 (biliary glycoprotein) | molecular_function                                                                                                                                               | angiogenesis, biological_process, cell migration, homophilic cell adhesion, integrin-mediated signaling pathway                                                                                                                                                                                                                                                                                                                              |
| CEACAM3  | carcinoembryonic antigen-related cell adhesion molecule 3                        |                                                                                                                                                                  |                                                                                                                                                                                                                                                                                                                                                                                                                                              |
| CEACAM4  | carcinoembryonic antigen-related cell adhesion molecule 4                        |                                                                                                                                                                  |                                                                                                                                                                                                                                                                                                                                                                                                                                              |
| CETP     | cholesteryl ester transfer protein, plasma                                       | cholesterol binding, cholesterol transporter activity, phosphatidylcholine binding, phospholipid transporter activity, triglyceride binding                      | acylglycerol homeostasis, cholesterol homeostasis, cholesterol metabolic process, high-density lipoprotein particle remodeling, lipid metabolic process, low-density lipoprotein particle remodeling, phosphatidylcholine metabolic process, phospholipid homeostasis, phospholipid transport, reverse cholesterol transport, steroid metabolic process, triacylglycerol metabolic process, very-low-density lipoprotein particle remodeling |
| CLEC4D   | C-type lectin domain family 4, member D                                          | binding, sugar binding                                                                                                                                           | immune response                                                                                                                                                                                                                                                                                                                                                                                                                              |
| CLEC5A   | C-type lectin domain family 5, member A                                          | binding, binding, sugar binding                                                                                                                                  | cellular defense response, immune response, signal transduction                                                                                                                                                                                                                                                                                                                                                                              |
| CLU      | clusterin                                                                        | protein binding                                                                                                                                                  | anti-apoptosis, apoptosis, cell death, complement activation, classical pathway, endocrine pancreas development, innate immune response, lipid metabolic process, neurite morphogenesis, positive regulation                                                                                                                                                                                                                                 |

|        |                                                      |                                                                                                                                                                            |                                                                                                                                                                                             |
|--------|------------------------------------------------------|----------------------------------------------------------------------------------------------------------------------------------------------------------------------------|---------------------------------------------------------------------------------------------------------------------------------------------------------------------------------------------|
|        |                                                      |                                                                                                                                                                            | of cell differentiation, positive regulation of cell proliferation, response to oxidative stress                                                                                            |
| CPM    | carboxypeptidase M                                   | carboxypeptidase A activity, metal ion binding, metallopeptidase activity, zinc ion binding                                                                                | anatomical structure morphogenesis, proteolysis                                                                                                                                             |
| CST7   | cystatin F (leukocystatin)                           | cysteine protease inhibitor activity                                                                                                                                       | immune response                                                                                                                                                                             |
| DEFT1P | defensin, theta 1 pseudogene                         |                                                                                                                                                                            |                                                                                                                                                                                             |
| FABP4  | fatty acid binding protein 4, adipocyte              | fatty acid binding, protein binding, transcription repressor activity, transporter activity                                                                                | cholesterol homeostasis, cytokine production, negative regulation of protein kinase activity, negative regulation of transcription, positive regulation of inflammatory response, transport |
| FBN2   | fibrillin 2 (congenital contractural arachnodactyly) | binding, calcium ion binding, extracellular matrix structural constituent                                                                                                  | anatomical structure morphogenesis, embryonic limb morphogenesis                                                                                                                            |
| FBXO9  | F-box protein 9                                      | ubiquitin-protein ligase activity                                                                                                                                          | protein ubiquitination                                                                                                                                                                      |
| FRMD3  | FERM domain containing 3                             | binding, cytoskeletal protein binding                                                                                                                                      |                                                                                                                                                                                             |
| GGTA1  | glycoprotein, alpha-galactosyltransferase 1          | transferase activity, transferring hexosyl groups                                                                                                                          | carbohydrate metabolic process                                                                                                                                                              |
| GPR177 | G protein-coupled receptor 177                       | receptor activity, signal transducer activity                                                                                                                              | positive regulation of I-kappaB kinase/NF-kappaB cascade                                                                                                                                    |
| GPX3   | glutathione peroxidase 3 (plasma)                    | glutathione binding, glutathione peroxidase activity, oxidoreductase activity, selenium binding, transcription factor binding                                              | glutathione metabolic process, hydrogen peroxide catabolic process, oxidation reduction, protein homotetramerization, response to lipid hydroperoxide, response to oxidative stress         |
| GYG1   | glycogenin 1                                         | glycogenin glucosyltransferase activity, glycogenin glucosyltransferase activity, protein binding, transferase activity, transferase activity, transferring hexosyl groups | carbohydrate biosynthetic process, glycogen biosynthetic process                                                                                                                            |
| GYPB   | glycophorin B (MNS blood group)                      |                                                                                                                                                                            |                                                                                                                                                                                             |
| HBQ1   | hemoglobin, theta 1                                  | heme binding, iron ion binding, metal ion binding, oxygen binding, oxygen transporter activity                                                                             | oxygen transport, transport                                                                                                                                                                 |

|           |                                                                                  |                                                                                                                                                                     |                                                                                                                                                                                                                                                                                                                                                                                                                                                                                                                                                                                                                                                                                                                                                                                                                                                                                                                                                  |
|-----------|----------------------------------------------------------------------------------|---------------------------------------------------------------------------------------------------------------------------------------------------------------------|--------------------------------------------------------------------------------------------------------------------------------------------------------------------------------------------------------------------------------------------------------------------------------------------------------------------------------------------------------------------------------------------------------------------------------------------------------------------------------------------------------------------------------------------------------------------------------------------------------------------------------------------------------------------------------------------------------------------------------------------------------------------------------------------------------------------------------------------------------------------------------------------------------------------------------------------------|
| HSPC159   | galectin-related protein                                                         | sugar binding                                                                                                                                                       |                                                                                                                                                                                                                                                                                                                                                                                                                                                                                                                                                                                                                                                                                                                                                                                                                                                                                                                                                  |
| IGKV1D-13 | immunoglobulin kappa variable 1D-13                                              |                                                                                                                                                                     |                                                                                                                                                                                                                                                                                                                                                                                                                                                                                                                                                                                                                                                                                                                                                                                                                                                                                                                                                  |
| INHBA     | inhibin, beta A                                                                  | activin inhibitor activity, cytokine activity, follistatin binding, growth factor activity, hormone activity, identical protein binding                             | G1/S transition of mitotic cell cycle, cell cycle arrest, cell differentiation, cell surface receptor linked signal transduction, cell-cell signaling, defense response, growth, hemoglobin biosynthetic process, induction of apoptosis, negative regulation of B cell differentiation, negative regulation of cell cycle, negative regulation of cell growth, negative regulation of follicle-stimulating hormone secretion, negative regulation of interferon-gamma biosynthetic process, negative regulation of macrophage differentiation, negative regulation of phosphorylation, nervous system development, ovarian follicle development, positive regulation of erythrocyte differentiation, positive regulation of follicle-stimulating hormone secretion, positive regulation of transcription from RNA polymerase II promoter, regulation of activin receptor signaling pathway, response to external stimulus, skeletal development |
| ITGA2B    | integrin, alpha 2b (platelet glycoprotein IIb of IIb/IIIa complex, antigen CD41) | calcium ion binding, identical protein binding, protein binding, receptor activity                                                                                  | cell adhesion, cell adhesion, integrin-mediated signaling pathway                                                                                                                                                                                                                                                                                                                                                                                                                                                                                                                                                                                                                                                                                                                                                                                                                                                                                |
| KEL       | Kell blood group, metallo-endopeptidase                                          | endopeptidase activity, endothelin-converting enzyme activity, metal ion binding, metallopeptidase activity, neprilysin activity, protein binding, zinc ion binding | protein amino acid N-linked glycosylation, proteolysis, vasoconstriction                                                                                                                                                                                                                                                                                                                                                                                                                                                                                                                                                                                                                                                                                                                                                                                                                                                                         |
| LILRA2    | leukocyte immunoglobulin-like receptor, subfamily A (with TM domain), member 2   | antigen binding, receptor activity, receptor activity                                                                                                               | defense response, immune response, signal transduction                                                                                                                                                                                                                                                                                                                                                                                                                                                                                                                                                                                                                                                                                                                                                                                                                                                                                           |
| LIN7A     | lin-7 homolog A (C. elegans)                                                     | protein binding                                                                                                                                                     | exocytosis, neurotransmitter secretion, protein complex assembly, protein transport, synaptic vesicle transport                                                                                                                                                                                                                                                                                                                                                                                                                                                                                                                                                                                                                                                                                                                                                                                                                                  |
| LOC643072 | hypothetical LOC643072                                                           |                                                                                                                                                                     |                                                                                                                                                                                                                                                                                                                                                                                                                                                                                                                                                                                                                                                                                                                                                                                                                                                                                                                                                  |
| LOC643332 | similar to Nonsecretory ribonuclease precursor (Ribonuclease US)                 | nucleic acid binding, pancreatic ribonuclease activity                                                                                                              |                                                                                                                                                                                                                                                                                                                                                                                                                                                                                                                                                                                                                                                                                                                                                                                                                                                                                                                                                  |

|           |                                                                          |                                                                                                                                                         |                                                                                                                                                                   |
|-----------|--------------------------------------------------------------------------|---------------------------------------------------------------------------------------------------------------------------------------------------------|-------------------------------------------------------------------------------------------------------------------------------------------------------------------|
|           | (Eosinophil-derived neurotoxin) (RNase UpI-2) (Ribonuclease 2) (RNase 2) |                                                                                                                                                         |                                                                                                                                                                   |
| LOC644538 | hypothetical protein LOC644538                                           |                                                                                                                                                         |                                                                                                                                                                   |
| LOC646576 | hypothetical LOC646576                                                   |                                                                                                                                                         |                                                                                                                                                                   |
| LRP3      | low density lipoprotein receptor-related protein 3                       | receptor activity                                                                                                                                       | receptor-mediated endocytosis                                                                                                                                     |
| LRRN4     | leucine rich repeat neuronal 4                                           | protein binding                                                                                                                                         |                                                                                                                                                                   |
| MFAP3L    | microfibrillar-associated protein 3-like                                 |                                                                                                                                                         |                                                                                                                                                                   |
| MFSD10    | major facilitator superfamily domain containing 10                       | tetracycline transporter activity, transporter activity                                                                                                 | apoptosis, transport                                                                                                                                              |
| MGC13057  | hypothetical protein MGC13057                                            |                                                                                                                                                         |                                                                                                                                                                   |
| MGST1     | microsomal glutathione S-transferase 1                                   | glutathione transferase activity, transferase activity                                                                                                  | glutathione metabolic process                                                                                                                                     |
| MYL4      | myosin, light chain 4, alkali; atrial, embryonic                         | actin filament binding, actin monomer binding, calcium ion binding, motor activity, myosin II heavy chain binding, structural constituent of muscle     | cardiac muscle contraction, muscle development, positive regulation of ATPase activity, regulation of the force of heart contraction, striated muscle contraction |
| NAALADL1  | N-acetylated alpha-linked acidic dipeptidase-like 1                      | carboxypeptidase activity, dipeptidase activity, glutamate carboxypeptidase II activity, metal ion binding, metallopeptidase activity, zinc ion binding | proteolysis                                                                                                                                                       |
| NADK      | NAD kinase                                                               | NAD+ kinase activity, NAD+ kinase activity, NAD+ kinase activity, metal ion binding, protein binding, transferase activity                              | ATP metabolic process, NAD metabolic process, metabolic process, phosphorylation                                                                                  |
| NFIA      | nuclear factor I/A                                                       | transcription factor activity, transcription factor activity, transcription factor binding                                                              | DNA replication, regulation of transcription, DNA-dependent, regulation of transcription, DNA-dependent, transcription, viral genome replication                  |
| NKD2      | naked cuticle homolog 2 (Drosophila)                                     | calcium ion binding, protein binding                                                                                                                    | Wnt receptor signaling pathway, exocytosis, transport                                                                                                             |
| NP        | nucleoside phosphorylase                                                 | purine-nucleoside phosphorylase activity, purine-nucleoside phosphorylase                                                                               | DNA modification, inosine catabolic process, nucleobase, nucleoside, nucleotide and nucleic acid metabolic                                                        |

|         |                                                               |                                                                                                                                                                                                                                                           |                                                                                                                                                                                                                   |
|---------|---------------------------------------------------------------|-----------------------------------------------------------------------------------------------------------------------------------------------------------------------------------------------------------------------------------------------------------|-------------------------------------------------------------------------------------------------------------------------------------------------------------------------------------------------------------------|
|         |                                                               | activity, purine-nucleoside phosphorylase activity                                                                                                                                                                                                        | process, nucleobase, nucleoside, nucleotide and nucleic acid metabolic process, positive regulation of T cell proliferation, positive regulation of alpha-beta T cell differentiation, urate biosynthetic process |
| NRGN    | neurogranin (protein kinase C substrate, RC3)                 | calmodulin binding                                                                                                                                                                                                                                        | nervous system development, signal transduction                                                                                                                                                                   |
| NTN2L   | netrin 2-like (chicken)                                       | molecular_function, receptor binding                                                                                                                                                                                                                      | axon guidance                                                                                                                                                                                                     |
| ORM2    | orosomucoid 2                                                 | binding                                                                                                                                                                                                                                                   | acute-phase response                                                                                                                                                                                              |
| P2RY2   | purinergic receptor P2Y, G-protein coupled, 2                 | purinergic nucleotide receptor activity, G-protein coupled, receptor activity, rhodopsin-like receptor activity                                                                                                                                           | G-protein signaling, coupled to IP3 second messenger (phospholipase C activating), cellular ion homeostasis, signal transduction                                                                                  |
| PBX1    | pre-B-cell leukemia homeobox 1                                | protein binding, sequence-specific DNA binding, transcription factor activity                                                                                                                                                                             | C21-steroid hormone biosynthetic process, cell differentiation, regulation of transcription, DNA-dependent, sex determination                                                                                     |
| PDXK    | pyridoxal (pyridoxine, vitamin B6) kinase                     | ATP binding, lithium ion binding, magnesium ion binding, nucleotide binding, potassium ion binding, protein homodimerization activity, pyridoxal kinase activity, pyridoxal phosphate binding, sodium ion binding, transferase activity, zinc ion binding | cell proliferation, pyridoxal phosphate biosynthetic process, pyridoxine biosynthetic process, vitamin B6 metabolic process                                                                                       |
| PF4     | platelet factor 4 (chemokine (C-X-C motif) ligand 4)          | chemokine activity, heparin binding                                                                                                                                                                                                                       | cytokine and chemokine mediated signaling pathway, immune response, leukocyte chemotaxis, negative regulation of angiogenesis, negative regulation of megakaryocyte differentiation, platelet activation          |
| PLD1    | phospholipase D1, phosphatidylcholine-specific                | hydrolase activity, phosphoinositide binding, phospholipase D activity, protein binding                                                                                                                                                                   | Ras protein signal transduction, cell communication, chemotaxis, lipid catabolic process, metabolic process                                                                                                       |
| PPBP    | pro-platelet basic protein (chemokine (C-X-C motif) ligand 7) | chemokine activity, glucose transmembrane transporter activity, growth factor activity                                                                                                                                                                    | cell proliferation, chemotaxis, defense response to bacterium, glucose transport, immune response                                                                                                                 |
| PSTPIP1 | proline-serine-threonine phosphatase interacting protein 1    | catalytic activity, protein binding                                                                                                                                                                                                                       | cell adhesion, signal transduction                                                                                                                                                                                |



|           |                                                                                 |                                                                                                                                                                                                                                                                                                                                                    |                                                                                                                                                                                                     |
|-----------|---------------------------------------------------------------------------------|----------------------------------------------------------------------------------------------------------------------------------------------------------------------------------------------------------------------------------------------------------------------------------------------------------------------------------------------------|-----------------------------------------------------------------------------------------------------------------------------------------------------------------------------------------------------|
| PTX3      | pentraxin-related gene, rapidly induced by IL-1 beta                            | zymosan binding                                                                                                                                                                                                                                                                                                                                    | inflammatory response, opsonization, positive regulation of nitric oxide biosynthetic process, positive regulation of phagocytosis, response to yeast                                               |
| PYGL      | phosphorylase, glycogen; liver (Hers disease, glycogen storage disease type VI) | AMP binding, ATP binding, bile acid binding, drug binding, glucose binding, glycogen phosphorylase activity, nucleotide binding, phosphorylase activity, protein homodimerization activity, purine binding, pyridoxal phosphate binding, transferase activity, transferring glycosyl groups                                                        | carbohydrate metabolic process, glucose homeostasis, glycogen metabolic process                                                                                                                     |
| QPCT      | glutaminyl-peptide cyclotransferase (glutaminyl cyclase)                        | acyltransferase activity, glutaminyl-peptide cyclotransferase activity, metal ion binding, peptidase activity, transferase activity, zinc ion binding                                                                                                                                                                                              | protein modification process, proteolysis                                                                                                                                                           |
| RAB27A    | RAB27A, member RAS oncogene family                                              | GTP binding, GTPase activity, nucleotide binding                                                                                                                                                                                                                                                                                                   | protein transport, small GTPase mediated signal transduction                                                                                                                                        |
| REPS2     | RALBP1 associated Eps domain containing 2                                       | calcium ion binding, calcium ion binding, protein binding                                                                                                                                                                                                                                                                                          | epidermal growth factor receptor signaling pathway, protein complex assembly                                                                                                                        |
| RHD       | Rh blood group, D antigen                                                       | molecular_function                                                                                                                                                                                                                                                                                                                                 | biological_process                                                                                                                                                                                  |
| ROGDI     | rogdi homolog (Drosophila)                                                      |                                                                                                                                                                                                                                                                                                                                                    |                                                                                                                                                                                                     |
| RXRA      | retinoid X receptor, alpha                                                      | ligand-regulated transcription factor activity, metal ion binding, molecular_function, protein binding, retinoid-X receptor activity, sequence-specific DNA binding, steroid binding, steroid hormone receptor activity, tRNA-pseudouridine synthase activity, transcription coactivator activity, transcription factor activity, zinc ion binding | biological_process, positive regulation of transcription from RNA polymerase II promoter, regulation of transcription, DNA-dependent, signal transduction, transcription, vitamin metabolic process |
| SERPINB10 | serpin peptidase inhibitor, clade B (ovalbumin), member 10                      | protein binding, serine-type endopeptidase inhibitor activity                                                                                                                                                                                                                                                                                      |                                                                                                                                                                                                     |
| SIRPA     | signal-regulatory protein alpha                                                 |                                                                                                                                                                                                                                                                                                                                                    | cell adhesion                                                                                                                                                                                       |

|          |                                                                                 |                                                                                                                  |                                                                                                     |
|----------|---------------------------------------------------------------------------------|------------------------------------------------------------------------------------------------------------------|-----------------------------------------------------------------------------------------------------|
| SIRPB1   | signal-regulatory protein beta 1                                                |                                                                                                                  | cell surface receptor linked signal transduction                                                    |
| SLC22A15 | solute carrier family 22, member 15                                             | transporter activity                                                                                             | transport                                                                                           |
| SNTB1    | syntrophin, beta 1 (dystrophin-associated protein A1, 59kDa, basic component 1) | actin binding, calcium ion binding, calmodulin binding                                                           | muscle contraction                                                                                  |
| SYNE1    | spectrin repeat containing, nuclear envelope 1                                  | actin binding, actin binding, lamin binding, structural molecule activity                                        | Golgi organization and biogenesis, muscle cell differentiation, nuclear organization and biogenesis |
| TMEM50B  | transmembrane protein 50B                                                       | molecular_function                                                                                               | biological_process                                                                                  |
| TMEM56   | transmembrane protein 56                                                        |                                                                                                                  |                                                                                                     |
| TPRG1L   | tumor protein p63 regulated 1-like                                              |                                                                                                                  |                                                                                                     |
| TRIM10   | tripartite motif-containing 10                                                  | metal ion binding, protein binding, zinc ion binding, zinc ion binding                                           | hemopoiesis                                                                                         |
| TSPAN7   | tetraspanin 7                                                                   |                                                                                                                  | protein amino acid N-linked glycosylation                                                           |
| UNQ464   | GLPG464                                                                         |                                                                                                                  |                                                                                                     |
| WIP1I    | WD repeat domain, phosphoinositide interacting 1                                | androgen receptor binding, estrogen receptor binding, phosphatidylinositol 3-phosphate binding, receptor binding | autophagy, vesicle targeting, trans-Golgi to endosome                                               |

**Table S21:** The titles and functions of 200 most differentially expressed genes.

| Gene symbol | Gene title                                     | GO:Function                                                                                                                                                     | GO:Process                                                                   |
|-------------|------------------------------------------------|-----------------------------------------------------------------------------------------------------------------------------------------------------------------|------------------------------------------------------------------------------|
| ABHD5       | abhydrolase domain containing 5                | aminopeptidase activity, hydrolase activity, protein binding                                                                                                    | lipid metabolic process, proteolysis, sensory perception of sound            |
| ACPP        | acid phosphatase, prostate                     | acid phosphatase activity, hydrolase activity                                                                                                                   |                                                                              |
| ACRBP       | acrosin binding protein                        | molecular_function                                                                                                                                              | biological_process                                                           |
| ADD2        | adducin 2 (beta)                               | actin binding, calmodulin binding, metal ion binding                                                                                                            |                                                                              |
| AGPAT9      | 1-acylglycerol-3-phosphate O-acyltransferase 9 | 1-acylglycerol-3-phosphate O-acyltransferase activity, acyltransferase activity, transferase activity                                                           | metabolic process, phospholipid biosynthetic process                         |
| AGTRAP      | angiotensin II receptor-associated protein     |                                                                                                                                                                 |                                                                              |
| ALAD        | aminolevulinate, delta-, dehydratase           | lyase activity, metal ion binding, porphobilinogen synthase activity, porphobilinogen synthase activity, zinc ion binding                                       | heme biosynthetic process, metabolic process, porphyrin biosynthetic process |
| ALDH1A1     | aldehyde dehydrogenase 1 family, member A1     | Ras GTPase activator activity, aldehyde dehydrogenase (NAD) activity, aldehyde dehydrogenase (NAD) activity, androgen binding, oxidoreductase activity, retinal | aldehyde metabolic process, metabolic process, oxidation reduction           |

|          |                                                                      |                                                                                                                                                                                                                                                                                 |                                                                                                                                                                            |
|----------|----------------------------------------------------------------------|---------------------------------------------------------------------------------------------------------------------------------------------------------------------------------------------------------------------------------------------------------------------------------|----------------------------------------------------------------------------------------------------------------------------------------------------------------------------|
|          |                                                                      | dehydrogenase activity                                                                                                                                                                                                                                                          |                                                                                                                                                                            |
| ALDH3A2  | aldehyde dehydrogenase 3 family, member A2                           | 3-chloroallyl aldehyde dehydrogenase activity, aldehyde dehydrogenase (NAD) activity, aldehyde dehydrogenase (NAD(P)+) activity, oxidoreductase activity                                                                                                                        | aldehyde metabolic process, central nervous system development, epidermis development, lipid metabolic process, oxidation reduction, peripheral nervous system development |
| ALDH3B1  | aldehyde dehydrogenase 3 family, member B1                           | 3-chloroallyl aldehyde dehydrogenase activity, aldehyde dehydrogenase [NAD(P)+] activity, oxidoreductase activity                                                                                                                                                               | alcohol metabolic process, aldehyde metabolic process, lipid metabolic process, metabolic process, oxidation reduction                                                     |
| ANK1     | ankyrin 1, erythrocytic                                              | cytoskeletal adaptor activity, enzyme binding, spectrin binding, structural constituent of cytoskeleton                                                                                                                                                                         | cytoskeleton organization and biogenesis, exocytosis, maintenance of epithelial cell polarity, signal transduction                                                         |
| ANKRD18A | ankyrin repeat domain 18A                                            |                                                                                                                                                                                                                                                                                 |                                                                                                                                                                            |
| ANKRD22  | ankyrin repeat domain 22                                             |                                                                                                                                                                                                                                                                                 |                                                                                                                                                                            |
| APOC1    | apolipoprotein C-I                                                   | lipid transporter activity                                                                                                                                                                                                                                                      | cholesterol efflux, lipid metabolic process, lipid transport, lipoprotein metabolic process, phospholipid efflux                                                           |
| ARHGAP24 | Rho GTPase activating protein 24                                     | GTPase activator activity, protein binding                                                                                                                                                                                                                                      | angiogenesis, cell differentiation, multicellular organismal development, signal transduction                                                                              |
| ATP8B4   | ATPase, class I, type 8B, member 4                                   | ATP binding, ATPase activity, coupled to transmembrane movement of ions, phosphorylative mechanism, hydrolase activity, magnesium ion binding, nucleotide binding, phospholipid-translocating ATPase activity                                                                   | phospholipid transport, transport                                                                                                                                          |
| B3GALNT1 | beta-1,3-N-acetylgalactosaminyltransferase 1 (globoside blood group) | UDP-galactose:beta-N-acetylglucosamine beta-1,3-galactosyltransferase activity, galactosylgalactosylglucosylceramide beta-D-acetylgalactosaminyltransferase activity, galactosyltransferase activity, magnesium ion binding, transferase activity, transferring glycosyl groups | oligosaccharide biosynthetic process, protein amino acid glycosylation                                                                                                     |
| B4GALT5  | UDP-Gal:betaGlcNAc beta 1,4-                                         | galactosyltransferase activity, manganese ion binding, metal                                                                                                                                                                                                                    | carbohydrate metabolic process                                                                                                                                             |

|          |                                                                                  |                                                                                                                                                                  |                                                                                                                                                                                              |
|----------|----------------------------------------------------------------------------------|------------------------------------------------------------------------------------------------------------------------------------------------------------------|----------------------------------------------------------------------------------------------------------------------------------------------------------------------------------------------|
|          | galactosyltransferase, polypeptide 5                                             | ion binding, transferase activity, transferring glycosyl groups                                                                                                  |                                                                                                                                                                                              |
| BCL2L15  | BCL2-like 15                                                                     |                                                                                                                                                                  | apoptosis                                                                                                                                                                                    |
| C10orf11 | chromosome 10 open reading frame 11                                              | protein binding                                                                                                                                                  |                                                                                                                                                                                              |
| C12orf59 | chromosome 12 open reading frame 59                                              |                                                                                                                                                                  |                                                                                                                                                                                              |
| C1orf38  | chromosome 1 open reading frame 38                                               |                                                                                                                                                                  | cell adhesion                                                                                                                                                                                |
| C20orf27 | chromosome 20 open reading frame 27                                              |                                                                                                                                                                  |                                                                                                                                                                                              |
| C22orf25 | chromosome 22 open reading frame 25                                              |                                                                                                                                                                  |                                                                                                                                                                                              |
| C5orf4   | chromosome 5 open reading frame 4                                                | catalytic activity                                                                                                                                               | metabolic process                                                                                                                                                                            |
| C9orf122 | chromosome 9 open reading frame 122                                              |                                                                                                                                                                  |                                                                                                                                                                                              |
| CCDC109A | coiled-coil domain containing 109A                                               |                                                                                                                                                                  |                                                                                                                                                                                              |
| CCNDBP1  | cyclin D-type binding-protein 1                                                  | protein binding                                                                                                                                                  | cell cycle                                                                                                                                                                                   |
| CCPG1    | cell cycle progression 1                                                         |                                                                                                                                                                  | cell cycle                                                                                                                                                                                   |
| CD36     | CD36 molecule (thrombospondin receptor)                                          | lipoprotein binding, low-density lipoprotein receptor activity, receptor activity                                                                                | blood coagulation, cell adhesion, lipid metabolic process, lipoprotein transport, transport                                                                                                  |
| CD3G     | CD3g molecule, gamma (CD3-TCR complex)                                           | T cell receptor binding, protein heterodimerization activity, receptor signaling complex scaffold activity, transmembrane receptor activity                      | T cell activation, cell surface receptor linked signal transduction, establishment and/or maintenance of cell polarity, protein complex assembly, protein transport, regulation of apoptosis |
| CDC14B   | CDC14 cell division cycle 14 homolog B (S. cerevisiae)                           | hydrolase activity, protein serine/threonine phosphatase activity, protein tyrosine phosphatase activity, protein tyrosine/serine/threonine phosphatase activity | cell division, protein amino acid dephosphorylation                                                                                                                                          |
| CEACAM1  | carcinoembryonic antigen-related cell adhesion molecule 1 (biliary glycoprotein) | molecular_function                                                                                                                                               | angiogenesis, biological_process, cell migration, homophilic cell adhesion, integrin-mediated signaling pathway                                                                              |
| CEACAM3  | carcinoembryonic antigen-related cell adhesion molecule 3                        |                                                                                                                                                                  |                                                                                                                                                                                              |
| CEACAM4  | carcinoembryonic antigen-related cell adhesion molecule 4                        |                                                                                                                                                                  |                                                                                                                                                                                              |

|         |                                                            |                                                                                                                                             |                                                                                                                                                                                                                                                                                                                                                                                                                                              |
|---------|------------------------------------------------------------|---------------------------------------------------------------------------------------------------------------------------------------------|----------------------------------------------------------------------------------------------------------------------------------------------------------------------------------------------------------------------------------------------------------------------------------------------------------------------------------------------------------------------------------------------------------------------------------------------|
| CEBPE   | CCAAT/enhancer binding protein (C/EBP), epsilon            | protein dimerization activity, sequence-specific DNA binding, transcription factor activity                                                 | cytokine biosynthetic process, defense response to bacterium, macrophage differentiation, phagocytosis, regulation of transcription, DNA-dependent, transcription                                                                                                                                                                                                                                                                            |
| CES1    | carboxylesterase 1 (monocyte/macrophage serine esterase 1) | carboxylesterase activity, carboxylesterase activity, hydrolase activity                                                                    | metabolic process, response to toxin                                                                                                                                                                                                                                                                                                                                                                                                         |
| CETP    | cholesteryl ester transfer protein, plasma                 | cholesterol binding, cholesterol transporter activity, phosphatidylcholine binding, phospholipid transporter activity, triglyceride binding | acylglycerol homeostasis, cholesterol homeostasis, cholesterol metabolic process, high-density lipoprotein particle remodeling, lipid metabolic process, low-density lipoprotein particle remodeling, phosphatidylcholine metabolic process, phospholipid homeostasis, phospholipid transport, reverse cholesterol transport, steroid metabolic process, triacylglycerol metabolic process, very-low-density lipoprotein particle remodeling |
| CLEC1B  | C-type lectin domain family 1, member B                    | binding, sugar binding, transmembrane receptor activity                                                                                     | cell surface receptor linked signal transduction, defense response                                                                                                                                                                                                                                                                                                                                                                           |
| CLEC4D  | C-type lectin domain family 4, member D                    | binding, sugar binding                                                                                                                      | immune response                                                                                                                                                                                                                                                                                                                                                                                                                              |
| CLEC5A  | C-type lectin domain family 5, member A                    | binding, binding, sugar binding                                                                                                             | cellular defense response, immune response, signal transduction                                                                                                                                                                                                                                                                                                                                                                              |
| CLTCL1  | clathrin, heavy chain-like 1                               | protein binding, signal transducer activity, structural molecule activity                                                                   | anatomical structure morphogenesis, intracellular protein transport, receptor-mediated endocytosis, vesicle-mediated transport                                                                                                                                                                                                                                                                                                               |
| CLU     | clusterin                                                  | protein binding                                                                                                                             | anti-apoptosis, apoptosis, cell death, complement activation, classical pathway, endocrine pancreas development, innate immune response, lipid metabolic process, neurite morphogenesis, positive regulation of cell differentiation, positive regulation of cell proliferation, response to oxidative stress                                                                                                                                |
| COL17A1 | collagen, type XVII, alpha 1                               | structural molecule activity                                                                                                                | cell-matrix adhesion, epidermis development, phosphate transport                                                                                                                                                                                                                                                                                                                                                                             |
| COQ2    | coenzyme Q2 homolog,                                       | prenyltransferase activity,                                                                                                                 | biosynthetic process, glycerol metabolic process, isoprenoid                                                                                                                                                                                                                                                                                                                                                                                 |

|        |                                                                    |                                                                                                                                                                                                                                                                                                                                 |                                                                                                                                                                                                                                                             |
|--------|--------------------------------------------------------------------|---------------------------------------------------------------------------------------------------------------------------------------------------------------------------------------------------------------------------------------------------------------------------------------------------------------------------------|-------------------------------------------------------------------------------------------------------------------------------------------------------------------------------------------------------------------------------------------------------------|
|        | prenyltransferase (yeast)                                          | transferase activity                                                                                                                                                                                                                                                                                                            | biosynthetic process, ubiquinone biosynthetic process                                                                                                                                                                                                       |
| CPM    | carboxypeptidase M                                                 | carboxypeptidase A activity, metal ion binding, metallopeptidase activity, zinc ion binding                                                                                                                                                                                                                                     | anatomical structure morphogenesis, proteolysis                                                                                                                                                                                                             |
| CST7   | cystatin F (leukocystatin)                                         | cysteine protease inhibitor activity                                                                                                                                                                                                                                                                                            | immune response                                                                                                                                                                                                                                             |
| CTSE   | cathepsin E                                                        | cathepsin E activity, pepsin A activity, peptidase activity                                                                                                                                                                                                                                                                     | antigen processing and presentation of exogenous peptide antigen via MHC class II, digestion, proteolysis                                                                                                                                                   |
| CTTN   | cortactin                                                          | protein binding                                                                                                                                                                                                                                                                                                                 |                                                                                                                                                                                                                                                             |
| CYBB   | cytochrome b-245, beta polypeptide (chronic granulomatous disease) | FAD binding, electron carrier activity, iron ion binding, metal ion binding, voltage-gated ion channel activity                                                                                                                                                                                                                 | inflammatory response, ion transport, oxidation reduction                                                                                                                                                                                                   |
| DAPK2  | death-associated protein kinase 2                                  | ATP binding, ATP binding, calmodulin binding, calmodulin-dependent protein kinase activity, identical protein binding, nucleotide binding, protein kinase activity, transferase activity                                                                                                                                        | apoptosis, induction of apoptosis, protein amino acid phosphorylation, protein amino acid phosphorylation, protein kinase cascade                                                                                                                           |
| DDEF1  | development and differentiation enhancing factor 1                 | ARF GTPase activator activity, metal ion binding, protein binding, zinc ion binding                                                                                                                                                                                                                                             | regulation of ARF GTPase activity                                                                                                                                                                                                                           |
| DEFT1P | defensin, theta 1 pseudogene                                       |                                                                                                                                                                                                                                                                                                                                 |                                                                                                                                                                                                                                                             |
| DHRS9  | dehydrogenase/reductase (SDR family) member 9                      | 3-alpha(17-beta)-hydroxysteroid dehydrogenase (NAD+) activity, 3-alpha(17-beta)-hydroxysteroid dehydrogenase (NAD+) activity, alcohol dehydrogenase activity, alcohol dehydrogenase activity, binding, oxidoreductase activity, racemase and epimerase activity, retinol dehydrogenase activity, retinol dehydrogenase activity | 9-cis-retinoic acid biosynthetic process, 9-cis-retinoic acid biosynthetic process, androgen metabolic process, androgen metabolic process, epithelial cell differentiation, oxidation reduction, progesterone metabolic process, retinol metabolic process |
| ENTPD1 | ectonucleoside triphosphate diphosphohydrolase 1                   | calcium ion binding, hydrolase activity, magnesium ion binding                                                                                                                                                                                                                                                                  | blood coagulation, cell adhesion                                                                                                                                                                                                                            |
| EPOR   | erythropoietin receptor                                            | erythropoietin receptor activity, guanyl-nucleotide exchange factor activity, protein binding                                                                                                                                                                                                                                   | brain development, elevation of cytosolic calcium ion concentration, heart development, signal transduction, signal transduction,                                                                                                                           |

|        |                                                                                |                                                                                                                                    |                                                                                                                                                                                             |
|--------|--------------------------------------------------------------------------------|------------------------------------------------------------------------------------------------------------------------------------|---------------------------------------------------------------------------------------------------------------------------------------------------------------------------------------------|
|        |                                                                                |                                                                                                                                    | small GTPase mediated signal transduction                                                                                                                                                   |
| FABP4  | fatty acid binding protein 4, adipocyte                                        | fatty acid binding, protein binding, transcription repressor activity, transporter activity                                        | cholesterol homeostasis, cytokine production, negative regulation of protein kinase activity, negative regulation of transcription, positive regulation of inflammatory response, transport |
| FBN2   | fibrillin 2 (congenital contractural arachnodactyly)                           | binding, calcium ion binding, extracellular matrix structural constituent                                                          | anatomical structure morphogenesis, embryonic limb morphogenesis                                                                                                                            |
| FBXO9  | F-box protein 9                                                                | ubiquitin-protein ligase activity                                                                                                  | protein ubiquitination                                                                                                                                                                      |
| FCAR   | Fc fragment of IgA, receptor for                                               | IgA binding, receptor activity                                                                                                     | immune response                                                                                                                                                                             |
| FCGR2C | Fc fragment of IgG, low affinity IIc, receptor for (CD32)                      | IgG binding, protein binding, receptor activity, transmembrane receptor activity                                                   | immune response                                                                                                                                                                             |
| FGF13  | fibroblast growth factor 13                                                    | growth factor activity, protein binding, protein kinase activator activity                                                         | MAPKKK cascade, cell-cell signaling, nervous system development, signal transduction                                                                                                        |
| FLOT2  | flotillin 2                                                                    | protein binding                                                                                                                    | cell adhesion, epidermis development                                                                                                                                                        |
| FPR2   | formyl peptide receptor 2                                                      | N-formyl peptide receptor activity, receptor activity, rhodopsin-like receptor activity                                            | G-protein coupled receptor protein signaling pathway, cell adhesion, cell motility, chemotaxis, inflammatory response, signal transduction                                                  |
| FRMD3  | FERM domain containing 3                                                       | binding, cytoskeletal protein binding                                                                                              |                                                                                                                                                                                             |
| FUT1   | fucosyltransferase 1 (galactoside 2-alpha-L-fucosyltransferase, H blood group) | fucosyltransferase activity, galactoside 2-alpha-L-fucosyltransferase activity, transferase activity, transferring glycosyl groups | L-fucose catabolic process, carbohydrate metabolic process, protein amino acid glycosylation                                                                                                |
| GATA1  | GATA binding protein 1 (globin transcription factor 1)                         | metal ion binding, sequence-specific DNA binding, transcription factor activity, zinc ion binding                                  | multicellular organismal development, regulation of transcription from RNA polymerase II promoter, transcription                                                                            |
| GGTA1  | glycoprotein, alpha-galactosyltransferase 1                                    | transferase activity, transferring hexosyl groups                                                                                  | carbohydrate metabolic process                                                                                                                                                              |
| GNG11  | guanine nucleotide binding protein (G protein), gamma 11                       | GTPase activity, signal transducer activity                                                                                        | G-protein coupled receptor protein signaling pathway, hormone-mediated signaling, signal transduction                                                                                       |



|            |                                          |                                                                                                                                                                            |                                                                                                                                                                                     |
|------------|------------------------------------------|----------------------------------------------------------------------------------------------------------------------------------------------------------------------------|-------------------------------------------------------------------------------------------------------------------------------------------------------------------------------------|
| GPR177     | G protein-coupled receptor 177           | receptor activity, signal transducer activity                                                                                                                              | positive regulation of I-kappaB kinase/NF-kappaB cascade                                                                                                                            |
| GPR84      | G protein-coupled receptor 84            | receptor activity, rhodopsin-like receptor activity                                                                                                                        | G-protein coupled receptor protein signaling pathway, biological_process, signal transduction                                                                                       |
| GPX3       | glutathione peroxidase 3 (plasma)        | glutathione binding, glutathione peroxidase activity, oxidoreductase activity, selenium binding, transcription factor binding                                              | glutathione metabolic process, hydrogen peroxide catabolic process, oxidation reduction, protein homotetramerization, response to lipid hydroperoxide, response to oxidative stress |
| GSN        | gelsolin (amyloidosis, Finnish type)     | actin binding, calcium ion binding, protein binding                                                                                                                        | actin filament polymerization, actin filament severing, barbed-end actin filament capping                                                                                           |
| GYG1       | glycogenin 1                             | glycogenin glucosyltransferase activity, glycogenin glucosyltransferase activity, protein binding, transferase activity, transferase activity, transferring hexosyl groups | carbohydrate biosynthetic process, glycogen biosynthetic process                                                                                                                    |
| GYPB       | glycophorin B (MNS blood group)          |                                                                                                                                                                            |                                                                                                                                                                                     |
| HBQ1       | hemoglobin, theta 1                      | heme binding, iron ion binding, metal ion binding, oxygen binding, oxygen transporter activity                                                                             | oxygen transport, transport                                                                                                                                                         |
| HLX        | H2.0-like homeobox                       | sequence-specific DNA binding, sequence-specific DNA binding, transcription factor activity                                                                                | cell differentiation, multicellular organismal development, regulation of transcription, DNA-dependent                                                                              |
| HPR        | haptoglobin-related protein              | catalytic activity, hemoglobin binding, serine-type endopeptidase activity                                                                                                 | proteolysis                                                                                                                                                                         |
| HPSE       | heparanase                               | beta-glucuronidase activity, calcium ion binding, hydrolase activity, magnesium ion binding                                                                                | proteoglycan metabolic process                                                                                                                                                      |
| HSPC159    | galectin-related protein                 | sugar binding                                                                                                                                                              |                                                                                                                                                                                     |
| HTRA3      | HtrA serine peptidase 3                  | insulin-like growth factor binding, peptidase activity, protein binding, serine-type endopeptidase activity                                                                | proteolysis, regulation of cell growth                                                                                                                                              |
| IGKV1D-13  | immunoglobulin kappa variable 1D-13      |                                                                                                                                                                            |                                                                                                                                                                                     |
| IGKV1OR15- | immunoglobulin kappa variable 1/OR15-118 |                                                                                                                                                                            |                                                                                                                                                                                     |

|        |                                                                                  |                                                                                                                                                                     |                                                                                                                                                                                                                                                                                                                                                                                                                                                                                                                                                                                                                                                                                                                                                                                                                                                                                                                                                  |
|--------|----------------------------------------------------------------------------------|---------------------------------------------------------------------------------------------------------------------------------------------------------------------|--------------------------------------------------------------------------------------------------------------------------------------------------------------------------------------------------------------------------------------------------------------------------------------------------------------------------------------------------------------------------------------------------------------------------------------------------------------------------------------------------------------------------------------------------------------------------------------------------------------------------------------------------------------------------------------------------------------------------------------------------------------------------------------------------------------------------------------------------------------------------------------------------------------------------------------------------|
| 118    |                                                                                  |                                                                                                                                                                     |                                                                                                                                                                                                                                                                                                                                                                                                                                                                                                                                                                                                                                                                                                                                                                                                                                                                                                                                                  |
| IMPACT | Impact homolog (mouse)                                                           | molecular_function                                                                                                                                                  | biological_process, regulation of translation                                                                                                                                                                                                                                                                                                                                                                                                                                                                                                                                                                                                                                                                                                                                                                                                                                                                                                    |
| INHBA  | inhibin, beta A                                                                  | activin inhibitor activity, cytokine activity, follistatin binding, growth factor activity, hormone activity, identical protein binding                             | G1/S transition of mitotic cell cycle, cell cycle arrest, cell differentiation, cell surface receptor linked signal transduction, cell-cell signaling, defense response, growth, hemoglobin biosynthetic process, induction of apoptosis, negative regulation of B cell differentiation, negative regulation of cell cycle, negative regulation of cell growth, negative regulation of follicle-stimulating hormone secretion, negative regulation of interferon-gamma biosynthetic process, negative regulation of macrophage differentiation, negative regulation of phosphorylation, nervous system development, ovarian follicle development, positive regulation of erythrocyte differentiation, positive regulation of follicle-stimulating hormone secretion, positive regulation of transcription from RNA polymerase II promoter, regulation of activin receptor signaling pathway, response to external stimulus, skeletal development |
| IRX5   | iroquois homeobox 5                                                              | sequence-specific DNA binding, transcription factor activity                                                                                                        | cell development, regulation of transcription, DNA-dependent                                                                                                                                                                                                                                                                                                                                                                                                                                                                                                                                                                                                                                                                                                                                                                                                                                                                                     |
| ITGA2B | integrin, alpha 2b (platelet glycoprotein IIb of IIb/IIIa complex, antigen CD41) | calcium ion binding, identical protein binding, protein binding, receptor activity                                                                                  | cell adhesion, cell adhesion, integrin-mediated signaling pathway                                                                                                                                                                                                                                                                                                                                                                                                                                                                                                                                                                                                                                                                                                                                                                                                                                                                                |
| KEL    | Kell blood group, metallo-endopeptidase                                          | endopeptidase activity, endothelin-converting enzyme activity, metal ion binding, metallopeptidase activity, neprilysin activity, protein binding, zinc ion binding | protein amino acid N-linked glycosylation, proteolysis, vasoconstriction                                                                                                                                                                                                                                                                                                                                                                                                                                                                                                                                                                                                                                                                                                                                                                                                                                                                         |
| KLF1   | Kruppel-like factor 1 (erythroid)                                                | metal ion binding, transcription factor activity, zinc ion binding                                                                                                  | chromatin remodeling, erythrocyte maturation, regulation of transcription, DNA-dependent, transcription                                                                                                                                                                                                                                                                                                                                                                                                                                                                                                                                                                                                                                                                                                                                                                                                                                          |
| LILRA2 | leukocyte immunoglobulin-like                                                    | antigen binding, receptor                                                                                                                                           | defense response, immune response,                                                                                                                                                                                                                                                                                                                                                                                                                                                                                                                                                                                                                                                                                                                                                                                                                                                                                                               |

|           |                                                                                                                                           |                                                                                                                                                                                       |                                                                                                                                                                                   |
|-----------|-------------------------------------------------------------------------------------------------------------------------------------------|---------------------------------------------------------------------------------------------------------------------------------------------------------------------------------------|-----------------------------------------------------------------------------------------------------------------------------------------------------------------------------------|
|           | receptor, subfamily A (with TM domain), member 2                                                                                          | activity, receptor activity                                                                                                                                                           | signal transduction                                                                                                                                                               |
| LIN7A     | lin-7 homolog A (C. elegans)                                                                                                              | protein binding                                                                                                                                                                       | exocytosis, neurotransmitter secretion, protein complex assembly, protein transport, synaptic vesicle transport                                                                   |
| LOC388588 | hypothetical LOC388588                                                                                                                    |                                                                                                                                                                                       |                                                                                                                                                                                   |
| LOC643072 | hypothetical LOC643072                                                                                                                    |                                                                                                                                                                                       |                                                                                                                                                                                   |
| LOC643332 | similar to Nonsecretory ribonuclease precursor (Ribonuclease US) (Eosinophil-derived neurotoxin) (RNase UpI-2) (Ribonuclease 2) (RNase 2) | nucleic acid binding, pancreatic ribonuclease activity                                                                                                                                |                                                                                                                                                                                   |
| LOC644538 | hypothetical protein LOC644538                                                                                                            |                                                                                                                                                                                       |                                                                                                                                                                                   |
| LOC646576 | hypothetical LOC646576                                                                                                                    |                                                                                                                                                                                       |                                                                                                                                                                                   |
| LOXL3     | lysyl oxidase-like 3                                                                                                                      | copper ion binding, copper ion binding, metal ion binding, oxidoreductase activity, protein-lysine 6-oxidase activity, protein-lysine 6-oxidase activity, scavenger receptor activity | biological_process, oxidation reduction                                                                                                                                           |
| LRG1      | leucine-rich alpha-2-glycoprotein 1                                                                                                       | molecular_function, protein binding                                                                                                                                                   | biological_process                                                                                                                                                                |
| LRP3      | low density lipoprotein receptor-related protein 3                                                                                        | receptor activity                                                                                                                                                                     | receptor-mediated endocytosis                                                                                                                                                     |
| LRRN4     | leucine rich repeat neuronal 4                                                                                                            | protein binding                                                                                                                                                                       |                                                                                                                                                                                   |
| LTB4R     | leukotriene B4 receptor                                                                                                                   | leukotriene B4 receptor activity, nucleotide binding, receptor activity                                                                                                               | G-protein signaling, coupled to IP3 second messenger (phospholipase C activating), cell motility, immune response, inflammatory response, muscle contraction, signal transduction |
| MANSC1    | MANSC domain containing 1                                                                                                                 | chitinase activity                                                                                                                                                                    |                                                                                                                                                                                   |
| MFAP3L    | microfibrillar-associated protein 3-like                                                                                                  |                                                                                                                                                                                       |                                                                                                                                                                                   |
| MFAP3L    | microfibrillar-associated protein 3-like                                                                                                  |                                                                                                                                                                                       |                                                                                                                                                                                   |

|          |                                                         |                                                                                                                                                         |                                                                                                                                                                                                                                                                                                                              |
|----------|---------------------------------------------------------|---------------------------------------------------------------------------------------------------------------------------------------------------------|------------------------------------------------------------------------------------------------------------------------------------------------------------------------------------------------------------------------------------------------------------------------------------------------------------------------------|
| MFSD10   | major facilitator superfamily domain containing 10      | tetracycline transporter activity, transporter activity                                                                                                 | apoptosis, transport                                                                                                                                                                                                                                                                                                         |
| MGC13057 | hypothetical protein MGC13057                           |                                                                                                                                                         |                                                                                                                                                                                                                                                                                                                              |
| MGST1    | microsomal glutathione S-transferase 1                  | glutathione transferase activity, transferase activity                                                                                                  | glutathione metabolic process                                                                                                                                                                                                                                                                                                |
| MOSC1    | MOCO sulphurase C-terminal domain containing 1          | molybdenum ion binding, oxidoreductase activity, pyridoxal phosphate binding                                                                            | oxidation reduction                                                                                                                                                                                                                                                                                                          |
| MYL4     | myosin, light chain 4, alkali; atrial, embryonic        | actin filament binding, actin monomer binding, calcium ion binding, motor activity, myosin II heavy chain binding, structural constituent of muscle     | cardiac muscle contraction, muscle development, positive regulation of ATPase activity, regulation of the force of heart contraction, striated muscle contraction                                                                                                                                                            |
| NAALADL1 | N-acetylated alpha-linked acidic dipeptidase-like 1     | carboxypeptidase activity, dipeptidase activity, glutamate carboxypeptidase II activity, metal ion binding, metallopeptidase activity, zinc ion binding | proteolysis                                                                                                                                                                                                                                                                                                                  |
| NADK     | NAD kinase                                              | NAD+ kinase activity, NAD+ kinase activity, NAD+ kinase activity, metal ion binding, protein binding, transferase activity                              | ATP metabolic process, NAD metabolic process, metabolic process, phosphorylation                                                                                                                                                                                                                                             |
| NFIA     | nuclear factor I/A                                      | transcription factor activity, transcription factor activity, transcription factor binding                                                              | DNA replication, regulation of transcription, DNA-dependent, regulation of transcription, DNA-dependent, transcription, viral genome replication                                                                                                                                                                             |
| NKD2     | naked cuticle homolog 2 (Drosophila)                    | calcium ion binding, protein binding                                                                                                                    | Wnt receptor signaling pathway, exocytosis, transport                                                                                                                                                                                                                                                                        |
| NP       | nucleoside phosphorylase                                | purine-nucleoside phosphorylase activity, purine-nucleoside phosphorylase activity, purine-nucleoside phosphorylase activity                            | DNA modification, inosine catabolic process, nucleobase, nucleoside, nucleotide and nucleic acid metabolic process, nucleobase, nucleoside, nucleotide and nucleic acid metabolic process, positive regulation of T cell proliferation, positive regulation of alpha-beta T cell differentiation, urate biosynthetic process |
| NPL      | N-acetylneuraminate pyruvate lyase (dihydrodipicolinate | N-acetylneuraminate lyase activity, lyase activity                                                                                                      | carbohydrate metabolic process, metabolic process                                                                                                                                                                                                                                                                            |

|         |                                                                         |                                                                                                                                                                                                                                                           |                                                                                                                                                                                                                |
|---------|-------------------------------------------------------------------------|-----------------------------------------------------------------------------------------------------------------------------------------------------------------------------------------------------------------------------------------------------------|----------------------------------------------------------------------------------------------------------------------------------------------------------------------------------------------------------------|
|         | synthase)                                                               |                                                                                                                                                                                                                                                           |                                                                                                                                                                                                                |
| NRGN    | neurogranin (protein kinase C substrate, RC3)                           | calmodulin binding                                                                                                                                                                                                                                        | nervous system development, signal transduction                                                                                                                                                                |
| NTN2L   | netrin 2-like (chicken)                                                 | molecular_function, receptor binding                                                                                                                                                                                                                      | axon guidance                                                                                                                                                                                                  |
| NUDT16P | nudix (nucleoside diphosphate linked moiety X)-type motif 16 pseudogene |                                                                                                                                                                                                                                                           |                                                                                                                                                                                                                |
| OLR1    | oxidized low density lipoprotein (lectin-like) receptor 1               | low-density lipoprotein receptor activity, protein binding, receptor activity, sugar binding                                                                                                                                                              | blood circulation, cell adhesion, immune response, inflammatory response, proteolysis                                                                                                                          |
| ORM2    | orosomucoid 2                                                           | binding                                                                                                                                                                                                                                                   | acute-phase response                                                                                                                                                                                           |
| P2RY2   | purinergic receptor P2Y, G-protein coupled, 2                           | purinergic nucleotide receptor activity, G-protein coupled, receptor activity, rhodopsin-like receptor activity                                                                                                                                           | G-protein signaling, coupled to IP3 second messenger (phospholipase C activating), cellular ion homeostasis, signal transduction                                                                               |
| PADI2   | peptidyl arginine deiminase, type II                                    | calcium ion binding, hydrolase activity, protein-arginine deiminase activity                                                                                                                                                                              | peptidyl-citrulline biosynthetic process from peptidyl-arginine, protein modification process                                                                                                                  |
| PADI4   | peptidyl arginine deiminase, type IV                                    | calcium ion binding, hydrolase activity, protein-arginine deiminase activity, protein-arginine deiminase activity                                                                                                                                         | chromatin modification, peptidyl-citrulline biosynthetic process from peptidyl-arginine, protein modification process, protein modification process, regulation of transcription, DNA-dependent, transcription |
| PARVB   | parvin, beta                                                            | actin binding, protein binding                                                                                                                                                                                                                            | cell adhesion                                                                                                                                                                                                  |
| PBX1    | pre-B-cell leukemia homeobox 1                                          | protein binding, sequence-specific DNA binding, transcription factor activity                                                                                                                                                                             | C21-steroid hormone biosynthetic process, cell differentiation, regulation of transcription, DNA-dependent, sex determination                                                                                  |
| PCOLCE2 | procollagen C-endopeptidase enhancer 2                                  | heparin binding, protein binding                                                                                                                                                                                                                          |                                                                                                                                                                                                                |
| PDXK    | pyridoxal (pyridoxine, vitamin B6) kinase                               | ATP binding, lithium ion binding, magnesium ion binding, nucleotide binding, potassium ion binding, protein homodimerization activity, pyridoxal kinase activity, pyridoxal phosphate binding, sodium ion binding, transferase activity, zinc ion binding | cell proliferation, pyridoxal phosphate biosynthetic process, pyridoxine biosynthetic process, vitamin B6 metabolic process                                                                                    |
| PF4     | platelet factor 4 (chemokine (C-X-C                                     | chemokine activity, heparin                                                                                                                                                                                                                               | cytokine and chemokine mediated signaling pathway, immune response,                                                                                                                                            |

|         |                                                               |                                                                                                                                                                                                                                                                                |                                                                                                                                                                                                                                                                                                                                    |
|---------|---------------------------------------------------------------|--------------------------------------------------------------------------------------------------------------------------------------------------------------------------------------------------------------------------------------------------------------------------------|------------------------------------------------------------------------------------------------------------------------------------------------------------------------------------------------------------------------------------------------------------------------------------------------------------------------------------|
|         | motif) ligand 4)                                              | binding                                                                                                                                                                                                                                                                        | leukocyte chemotaxis, negative regulation of angiogenesis, negative regulation of megakaryocyte differentiation, platelet activation                                                                                                                                                                                               |
| PIK3CB  | phosphoinositide-3-kinase, catalytic, beta polypeptide        | 1-phosphatidylinositol-3-kinase activity, binding, inositol or phosphatidylinositol kinase activity, insulin receptor substrate binding, phosphatidylinositol-4,5-bisphosphate 3-kinase activity, phosphotransferase activity, alcohol group as acceptor, transferase activity | G-protein coupled receptor protein signaling pathway, activation of MAPK activity, cellular calcium ion homeostasis, chemotaxis, embryonic cleavage, homophilic cell adhesion, phosphoinositide phosphorylation, phosphoinositide-mediated signaling, platelet activation, regulation of cell-matrix adhesion, signal transduction |
| PIP5K1B | phosphatidylinositol-4-phosphate 5-kinase, type I, beta       | 1-phosphatidylinositol-4-phosphate 5-kinase activity, kinase activity, protein binding, transferase activity                                                                                                                                                                   | phosphatidylinositol metabolic process, phosphorylation                                                                                                                                                                                                                                                                            |
| PKLR    | pyruvate kinase, liver and RBC                                | magnesium ion binding, potassium ion binding, pyruvate kinase activity, pyruvate kinase activity, transferase activity                                                                                                                                                         | glycolysis, glycolysis, response to other organism                                                                                                                                                                                                                                                                                 |
| PKP2    | plakophilin 2                                                 | binding, protein binding, structural molecule activity                                                                                                                                                                                                                         | cell-cell adhesion                                                                                                                                                                                                                                                                                                                 |
| PLA2G4A | phospholipase A2, group IVA (cytosolic, calcium-dependent)    | calcium ion binding, hydrolase activity, lysophospholipase activity, phospholipase A2 activity                                                                                                                                                                                 | icosanoid metabolic process, lipid catabolic process, metabolic process, phospholipid catabolic process, platelet activating factor biosynthetic process                                                                                                                                                                           |
| PLCG2   | phospholipase C, gamma 2 (phosphatidylinositol-specific)      | calcium ion binding, hydrolase activity, phosphoinositide phospholipase C activity, protein binding, signal transducer activity                                                                                                                                                | intracellular signaling cascade, lipid catabolic process                                                                                                                                                                                                                                                                           |
| PLD1    | phospholipase D1, phosphatidylcholine-specific                | hydrolase activity, phosphoinositide binding, phospholipase D activity, protein binding                                                                                                                                                                                        | Ras protein signal transduction, cell communication, chemotaxis, lipid catabolic process, metabolic process                                                                                                                                                                                                                        |
| PPBP    | pro-platelet basic protein (chemokine (C-X-C motif) ligand 7) | chemokine activity, glucose transmembrane transporter activity, growth factor activity                                                                                                                                                                                         | cell proliferation, chemotaxis, defense response to bacterium, glucose transport, immune response                                                                                                                                                                                                                                  |
| PRRG4   | proline rich Gla (G-carboxyglutamic acid) 4 (transmembrane)   | calcium ion binding, molecular_function                                                                                                                                                                                                                                        | biological_process                                                                                                                                                                                                                                                                                                                 |

|         |                                                                                 |                                                                                                                                                                                                                                                                                             |                                                                                                                                                                                         |
|---------|---------------------------------------------------------------------------------|---------------------------------------------------------------------------------------------------------------------------------------------------------------------------------------------------------------------------------------------------------------------------------------------|-----------------------------------------------------------------------------------------------------------------------------------------------------------------------------------------|
| PSTPIP1 | proline-serine-threonine phosphatase interacting protein 1                      | catalytic activity, protein binding                                                                                                                                                                                                                                                         | cell adhesion, signal transduction                                                                                                                                                      |
| PTAFR   | platelet-activating factor receptor                                             | phospholipid binding, platelet activating factor receptor activity, receptor activity                                                                                                                                                                                                       | G-protein coupled receptor protein signaling pathway, chemotaxis, cytokine production, immune response, inflammatory response, phosphoinositide-mediated signaling, signal transduction |
| PTX3    | pentraxin-related gene, rapidly induced by IL-1 beta                            | zymosan binding                                                                                                                                                                                                                                                                             | inflammatory response, opsonization, positive regulation of nitric oxide biosynthetic process, positive regulation of phagocytosis, response to yeast                                   |
| PYGL    | phosphorylase, glycogen; liver (Hers disease, glycogen storage disease type VI) | AMP binding, ATP binding, bile acid binding, drug binding, glucose binding, glycogen phosphorylase activity, nucleotide binding, phosphorylase activity, protein homodimerization activity, purine binding, pyridoxal phosphate binding, transferase activity, transferring glycosyl groups | carbohydrate metabolic process, glucose homeostasis, glycogen metabolic process                                                                                                         |
| QPCT    | glutaminyl-peptide cyclotransferase (glutaminyl cyclase)                        | acyltransferase activity, glutaminyl-peptide cyclotransferase activity, metal ion binding, peptidase activity, transferase activity, zinc ion binding                                                                                                                                       | protein modification process, proteolysis                                                                                                                                               |
| RAB27A  | RAB27A, member RAS oncogene family                                              | GTP binding, GTPase activity, nucleotide binding                                                                                                                                                                                                                                            | protein transport, small GTPase mediated signal transduction                                                                                                                            |
| RBP7    | retinol binding protein 7, cellular                                             | lipid binding, retinal binding, retinol binding, transporter activity                                                                                                                                                                                                                       | transport                                                                                                                                                                               |
| REPS2   | RALBP1 associated Eps domain containing 2                                       | calcium ion binding, calcium ion binding, protein binding                                                                                                                                                                                                                                   | epidermal growth factor receptor signaling pathway, protein complex assembly                                                                                                            |
| RHAG    | Rh-associated glycoprotein                                                      | ammonium transmembrane transporter activity, ammonium transmembrane transporter activity, ankyrin binding, molecular_function, phosphopantetheine binding                                                                                                                                   | ammonium transport, ammonium transport, blood circulation, cellular ion homeostasis, transport                                                                                          |

|           |                                                                 |                                                                                                                                                                                                                                                                                                                                                    |                                                                                                                                                                                                     |
|-----------|-----------------------------------------------------------------|----------------------------------------------------------------------------------------------------------------------------------------------------------------------------------------------------------------------------------------------------------------------------------------------------------------------------------------------------|-----------------------------------------------------------------------------------------------------------------------------------------------------------------------------------------------------|
| RHD       | Rh blood group, D antigen                                       | molecular_function                                                                                                                                                                                                                                                                                                                                 | biological_process                                                                                                                                                                                  |
| RNF217    | ring finger protein 217                                         | ligase activity, metal ion binding, protein binding, ubiquitin-protein ligase activity, zinc ion binding                                                                                                                                                                                                                                           | protein ubiquitination during ubiquitin-dependent protein catabolic process, ubiquitin cycle                                                                                                        |
| ROGDI     | rogdi homolog (Drosophila)                                      |                                                                                                                                                                                                                                                                                                                                                    |                                                                                                                                                                                                     |
| RXRA      | retinoid X receptor, alpha                                      | ligand-regulated transcription factor activity, metal ion binding, molecular_function, protein binding, retinoid-X receptor activity, sequence-specific DNA binding, steroid binding, steroid hormone receptor activity, tRNA-pseudouridine synthase activity, transcription coactivator activity, transcription factor activity, zinc ion binding | biological_process, positive regulation of transcription from RNA polymerase II promoter, regulation of transcription, DNA-dependent, signal transduction, transcription, vitamin metabolic process |
| SDPR      | serum deprivation response (phosphatidylserine binding protein) | phosphatidylserine binding, protein binding                                                                                                                                                                                                                                                                                                        |                                                                                                                                                                                                     |
| SEC14L4   | SEC14-like 4 (S. cerevisiae)                                    | lipid binding, transporter activity                                                                                                                                                                                                                                                                                                                | transport                                                                                                                                                                                           |
| SERPINB10 | serpin peptidase inhibitor, clade B (ovalbumin), member 10      | protein binding, serine-type endopeptidase inhibitor activity                                                                                                                                                                                                                                                                                      |                                                                                                                                                                                                     |
| SGMS2     | sphingomyelin synthase 2                                        | ceramide cholinephosphotransferase activity, kinase activity, sphingomyelin synthase activity, transferase activity                                                                                                                                                                                                                                | lipid metabolic process, sphingolipid metabolic process, sphingomyelin biosynthetic process                                                                                                         |
| SIGLEC5   | sialic acid binding Ig-like lectin 5                            | protein binding, sugar binding                                                                                                                                                                                                                                                                                                                     | cell adhesion                                                                                                                                                                                       |
| SIRPA     | signal-regulatory protein alpha                                 |                                                                                                                                                                                                                                                                                                                                                    | cell adhesion                                                                                                                                                                                       |
| SIRPB1    | signal-regulatory protein beta 1                                |                                                                                                                                                                                                                                                                                                                                                    | cell surface receptor linked signal transduction                                                                                                                                                    |
| SLC22A15  | solute carrier family 22, member 15                             | transporter activity                                                                                                                                                                                                                                                                                                                               | transport                                                                                                                                                                                           |
| SLC22A4   | solute carrier family 22 (organic cation/ergothioneine          | ATP binding, DNA binding, carnitine transporter activity, ion transmembrane transporter                                                                                                                                                                                                                                                            | body fluid secretion, carnitine transport, ion transport, nucleosome assembly, organic cation transport,                                                                                            |



|         |                                                                                 |                                                                                                                                                                                                                                                      |                                                                                                                                                                         |
|---------|---------------------------------------------------------------------------------|------------------------------------------------------------------------------------------------------------------------------------------------------------------------------------------------------------------------------------------------------|-------------------------------------------------------------------------------------------------------------------------------------------------------------------------|
|         | transporter), member 4                                                          | activity, nucleotide binding, secondary active organic cation transmembrane transporter activity, sodium ion binding, symporter activity, transporter activity                                                                                       | sodium ion transport                                                                                                                                                    |
| SLC2A5  | solute carrier family 2 (facilitated glucose/fructose transporter), member 5    | fructose transmembrane transporter activity, fructose transmembrane transporter activity, glucose transmembrane transporter activity, substrate-specific transmembrane transporter activity, sugar:hydrogen symporter activity, transporter activity | carbohydrate metabolic process, carbohydrate transport, fructose transport, glucose transport, transmembrane transport                                                  |
| SLC31A1 | solute carrier family 31 (copper transporters), member 1                        | copper ion binding, copper ion transmembrane transporter activity, copper ion transmembrane transporter activity                                                                                                                                     | copper ion transport, copper ion transport, ion transport                                                                                                               |
| SLPI    | secretory leukocyte peptidase inhibitor                                         | serine-type endopeptidase inhibitor activity                                                                                                                                                                                                         |                                                                                                                                                                         |
| SNTB1   | syntrophin, beta 1 (dystrophin-associated protein A1, 59kDa, basic component 1) | actin binding, calcium ion binding, calmodulin binding                                                                                                                                                                                               | muscle contraction                                                                                                                                                      |
| STEAP3  | STEAP family member 3                                                           | FAD binding, binding, copper ion binding, electron carrier activity, iron ion binding, metal ion binding                                                                                                                                             | apoptosis, cell cycle, ion transport, iron ion transport, oxidation reduction                                                                                           |
| STX11   | syntaxin 11                                                                     | SNAP receptor activity                                                                                                                                                                                                                               | intracellular protein transport, membrane fusion, vesicle-mediated transport                                                                                            |
| SYNE1   | spectrin repeat containing, nuclear envelope 1                                  | actin binding, actin binding, lamin binding, structural molecule activity                                                                                                                                                                            | Golgi organization and biogenesis, muscle cell differentiation, nuclear organization and biogenesis                                                                     |
| TACSTD2 | tumor-associated calcium signal transducer 2                                    | receptor activity                                                                                                                                                                                                                                    | cell proliferation, cell surface receptor linked signal transduction, response to stimulus, visual perception                                                           |
| TFF3    | trefoil factor 3 (intestinal)                                                   |                                                                                                                                                                                                                                                      | defense response, digestion                                                                                                                                             |
| TLR4    | toll-like receptor 4                                                            | lipopolysaccharide binding, protein binding, protein binding, transmembrane receptor activity, transmembrane receptor activity                                                                                                                       | I-kappaB kinase/NF-kappaB cascade, T-helper 1 type immune response, detection of fungus, inflammatory response, innate immune response, macrophage activation, negative |

|         |                                                       |                                                                                                                                           |                                                                                                                                                                                                                                                                                                                                          |
|---------|-------------------------------------------------------|-------------------------------------------------------------------------------------------------------------------------------------------|------------------------------------------------------------------------------------------------------------------------------------------------------------------------------------------------------------------------------------------------------------------------------------------------------------------------------------------|
|         |                                                       |                                                                                                                                           | regulation of osteoclast differentiation, positive regulation of interleukin-12 biosynthetic process, positive regulation of interleukin-12 biosynthetic process, positive regulation of interleukin-8 biosynthetic process, positive regulation of tumor necrosis factor biosynthetic process, signal transduction, signal transduction |
| TM6SF1  | transmembrane 6 superfamily member 1                  | molecular_function                                                                                                                        | biological_process                                                                                                                                                                                                                                                                                                                       |
| TMEM144 | transmembrane protein 144                             |                                                                                                                                           |                                                                                                                                                                                                                                                                                                                                          |
| TMEM50B | transmembrane protein 50B                             | molecular_function                                                                                                                        | biological_process                                                                                                                                                                                                                                                                                                                       |
| TMEM55A | transmembrane protein 55A                             | hydrolase activity                                                                                                                        |                                                                                                                                                                                                                                                                                                                                          |
| TMEM56  | transmembrane protein 56                              |                                                                                                                                           |                                                                                                                                                                                                                                                                                                                                          |
| TNFSF13 | tumor necrosis factor (ligand) superfamily, member 13 | cytokine activity, tumor necrosis factor receptor binding                                                                                 | immune response, positive regulation of cell proliferation, positive regulation of isotype switching to IgA isotypes, signal transduction                                                                                                                                                                                                |
| TPP1    | tripeptidyl peptidase I                               | protein binding, subtilase activity, tripeptidyl-peptidase I activity, tripeptidyl-peptidase I activity, tripeptidyl-peptidase I activity | bone resorption, lipid metabolic process, nervous system development, peptide catabolic process, protein catabolic process, proteolysis                                                                                                                                                                                                  |
| TPRG1L  | tumor protein p63 regulated 1-like                    |                                                                                                                                           |                                                                                                                                                                                                                                                                                                                                          |
| TRIM10  | tripartite motif-containing 10                        | metal ion binding, protein binding, zinc ion binding, zinc ion binding                                                                    | hemopoiesis                                                                                                                                                                                                                                                                                                                              |
| TSPAN7  | tetraspanin 7                                         |                                                                                                                                           | protein amino acid N-linked glycosylation                                                                                                                                                                                                                                                                                                |
| TUBB1   | tubulin, beta 1                                       | GTP binding, GTPase activity, nucleotide binding, structural molecule activity                                                            | microtubule-based movement, protein polymerization                                                                                                                                                                                                                                                                                       |
| TXNDC3  | thioredoxin domain containing 3 (spermatozoa)         | ATP binding, nucleoside diphosphate kinase activity                                                                                       | CTP biosynthetic process, GTP biosynthetic process, UTP biosynthetic process, cell differentiation, cell redox homeostasis, multicellular organismal development, spermatogenesis                                                                                                                                                        |

|        |                                                       |                                                                                                                                                                                   |                                                       |
|--------|-------------------------------------------------------|-----------------------------------------------------------------------------------------------------------------------------------------------------------------------------------|-------------------------------------------------------|
| UBAC1  | UBA domain containing 1                               | protein binding                                                                                                                                                                   | ubiquitin cycle                                       |
| UGCGL2 | UDP-glucose ceramide glucosyltransferase-like 2       | UDP-glucose:glycoprotein glucosyltransferase activity, UDP-glucose:glycoprotein glucosyltransferase activity, protein binding, transferase activity, transferring glycosyl groups | protein amino acid glycosylation                      |
| UNQ464 | GLPG464                                               |                                                                                                                                                                                   |                                                       |
| VCAM1  | vascular cell adhesion molecule 1                     | protein binding                                                                                                                                                                   | cell-cell adhesion                                    |
| VPS37C | vacuolar protein sorting 37 homolog C (S. cerevisiae) |                                                                                                                                                                                   | protein transport                                     |
| VSTM1  | V-set and transmembrane domain containing 1           |                                                                                                                                                                                   |                                                       |
| WIP11  | WD repeat domain, phosphoinositide interacting 1      | androgen receptor binding, estrogen receptor binding, phosphatidylinositol 3-phosphate binding, receptor binding                                                                  | autophagy, vesicle targeting, trans-Golgi to endosome |
